# Supplementary material
Source: PubMed Central journal article supplement (PMC3413614)
Supplement: supp_djs285_jnci_JNCI_11_1913_s01.pdf [file supp_djs285_jnci_JNCI_11_1913_s01.pdf]

**Supplementary Table 1. Results of quality assessment\***

| First author, year [reference]                                                  | Abstract | Rationale | Study design | Problem statement | Hypothesis | Setting | Definition of measurement | Eligibility | Follow-up method | Study size | Recruitment | Nonparticipation | Characteristics of participants | Amount of missing data | Follow-up time | Outcomes | Handling loss to follow-up | Measurements | Handling missing data | Reported results | Precision of study results | Statistical methods |
|---------------------------------------------------------------------------------|----------|-----------|--------------|-------------------|------------|---------|---------------------------|-------------|------------------|------------|-------------|------------------|---------------------------------|------------------------|----------------|----------|----------------------------|--------------|-----------------------|------------------|----------------------------|---------------------|
| <b>Geriatric assessment studied in a prospective observational study design</b> |          |           |              |                   |            |         |                           |             |                  |            |             |                  |                                 |                        |                |          |                            |              |                       |                  |                            |                     |
| Aaldriks, 2011 [18]                                                             | +        | +         | -            | +                 | -          | +       | +                         | +           | +                | -          | -           | -                | +                               | +                      | +              | +        | NA                         | +            | +/-                   | +                | +                          | +                   |
| Aparicio, 2011 [19]                                                             | +/-      | +         | +            | +                 | -          | +/-     | +/-                       | -           | +/-              | -          | -           | -                | +                               | +                      | +              | +        | -                          | +/-          | +                     | +                | NA                         | -                   |
| Arnoldi, 2007 [20]                                                              | +/-      | +         | -            | +/-               | -          | -       | -                         | -           | -                | -          | -           | -                | +                               | -                      | +              | +        | NA                         | +/-          | -                     | -                | ?                          | -                   |
| Audisio, 2008 [21] †                                                            | +        | +         | +            | +                 | +/-        | +       | +                         | +/-         | +                | -          | -           | -                | +                               | -                      | +              | +        | -                          | +            | -                     | +                | +                          | +                   |
| Bailey, 2003 [22] ‡                                                             | +        | +         | +            | +                 | -          | -       | +                         | -           | -                | -          | +           | -                | +/-                             | -                      | -              | +        | NA                         | +            | -                     | +                | +                          | +                   |
| Bailey, 2004 [23] ‡                                                             | +        | +         | +            | +                 | -          | -       | +                         | -           | -                | -          | +           | -                | +/-                             | -                      | +/-            | +        | -                          | +            | -                     | +                | +                          | +                   |
| Bamias, 2007 [24]                                                               | +        | +         | +            | +                 | -          | -       | +                         | -           | +/-              | +          | -           | -                | +                               | +                      | +/-            | +        | +                          | +/-          | +                     | +                | +                          | +                   |
| Bylow 2008 [25] §                                                               | +/-      | +         | +            | +                 | -          | +/-     | +                         | +           | +                | +          | -           | -                | +                               | -                      | +              | +        | +                          | +            | -                     | +                | NA                         | +                   |
| Castagneto, 2004 [26]                                                           | +        | +         | +            | +                 | -          | +/-     | +                         | +/-         | +                | +          | -           | -                | +                               | +                      | +              | +        | +                          | +            | +/-                   | +                | +                          | +                   |
| Chaibi, 2011 [27]                                                               | +/-      | +         | -            | +                 | -          | +/-     | +                         | +/-         | -                | -          | -           | -                | +                               | -                      | -              | +        | NA                         | +/-          | -                     | +                | NA                         | +                   |
| Clough-Gorr, 2010 [73]                                                          | +        | +         | +            | +                 | -          | +       | +                         | +           | +                | -          | +           | -                | +                               | +                      | -              | -        | NA                         | +            | +                     | +                | +                          | +                   |
| Extermann, 2004 [74]                                                            | +        | +         | +            | +                 | -          | +/-     | +                         | +/-         | +                | -          | +/-         | +/-              | +                               | -                      | +              | +        | +                          | +/-          | -                     | +/-              | +                          | +                   |
| Freyer, 2004 [28]                                                               | +        | +         | +            | +                 | -          | +/-     | +/-                       | +/-         | +                | +/-        | -           | -                | +                               | +                      | +              | +        | -                          | +/-          | +                     | +                | NA                         | +                   |
| Freyer, 2005 [29]                                                               | +        | +         | +            | +                 | -          | +/-     | +/-                       | +/-         | +/-              | +          | -           | -                | +                               | NA                     | -              | +        | NA                         | +/-          | NA                    | -                | -                          | +                   |
| Fukuse, 2005 [100]                                                              | +        | +         | +            | +                 | -          | +       | +/-                       | +           | +                | -          | -           | -                | +                               | NA                     | -              | +        | NA                         | +/-          | NA                    | +                | -                          | +                   |
| Hurria, 2006 [30]                                                               | +        | +         | +/-          | +                 | -          | +/-     | +                         | +/-         | +/-              | -          | -           | -                | +                               | +                      | +/-            | +        | +                          | +            | +                     | +                | NA                         | +/-                 |
| Hurria, 2006 [31]                                                               | +        | +         | +            | +                 | -          | +       | +                         | +/-         | +                | -          | -           | -                | +                               | NA                     | +              | +        | +                          | +            | NA                    | +                | NA                         | +                   |
| Hurria, 2006 [32]                                                               | +        | +         | +            | +                 | -          | +       | +                         | +           | +                | -          | -           | +/-              | +                               | +                      | +              | +        | NA                         | +            | NA                    | +                | NA                         | +                   |
| Kothari 2011 [33]                                                               | +/-      | +         | +            | +                 | +          | -       | +                         | +/-         | -                | -          | -           | -                | +                               | -                      | -              | +        | NA                         | +/-          | -                     | +                | +                          | +                   |
| Kristjansson, 2010 [75] ¶                                                       | +        | +         | +            | +                 | -          | +       | +                         | +           | +                | -          | +           | -                | +                               | -                      | +              | +        | NA                         | +            | -                     | +                | +                          | +                   |
| Kristjansson, 2010 [71] ¶                                                       | +        | +         | -            | +                 | -          | +       | +                         | +           | +                | +          | +           | -                | +                               | -                      | +              | +        | +                          | +            | -                     | +                | +                          | +                   |
| Marenco, 2008 [34]                                                              | +        | +         | +            | +                 | -          | +       | +                         | +           | +                | -          | +/-         | +/-              | +                               | -                      | +              | +        | -                          | +/-          | +                     | +                | +                          | +                   |
| Marinello, 2009 [35]                                                            | +/-      | +         | +            | +                 | -          | +/-     | +                         | +           | -                | -          | -           | -                | +                               | -                      | -              | +        | -                          | +            | NA                    | +                | +                          | +                   |
| Massa, 2006 [36]                                                                | +        | +         | +/-          | +                 | +          | +/-     | +                         | +/-         | +/-              | -          | -           | -                | +                               | +                      | +/-            | +/-      | NA                         | +            | NA                    | +/-              | -                          | +                   |
| Massa, 2008 [76]                                                                | +/-      | +         | +            | +                 | -          | +/-     | +/-                       | +/-         | +/-              | +          | -           | -                | +                               | -                      | +/-            | +        | -                          | +/-          | -                     | +/-              | +/-                        | +/-                 |
| Presant, 2005 [37]                                                              | +        | +         | -            | +/-               | +          | +/-     | +/-                       | +/-         | -                | -          | -           | -                | +/-                             | +                      | +/-            | +        | -                          | +            | +                     | +                | NA                         | -                   |
| Puts, 2011 [95] #                                                               | +        | +         | +            | +                 | -          | +       | +                         | +           | +                | +/-        | +           | +                | +                               | +                      | +/-            | +        | +                          | +            | +                     | +                | +                          | +                   |
| Puts 2010 [94] #                                                                | +        | +         | +            | +                 | -          | +       | +                         | +           | +                | +          | +           | +                | +                               | +                      | +/-            | +        | +                          | +            | +                     | +                | +                          | +                   |
| Rao 2005 [38]                                                                   | +        | +         | +            | +                 | +          | +       | +                         | +           | +                | +/-        | +           | +                | +                               | -                      | +              | +        | NA                         | +            | -                     | +                | +                          | +                   |
| Tredan, 2007 [39]                                                               | +        | +         | +            | +                 | -          | +       | +                         | +           | -                | -          | -           | -                | +                               | -                      | -              | +        | +/-                        | +/-          | -                     | +                | +                          | +                   |
| Tucci 2009 [40]                                                                 | +/-      | +         | +/-          | +                 | -          | +/-     | +/-                       | +/-         | -                | -          | -           | -                | +                               | -                      | -              | +        | -                          | +/-          | NA                    | +                | NA                         | +/-                 |
| Wedding, 2007 [41] **                                                           | +        | +         | +/-          | +                 | -          | +/-     | +                         | +/-         | -                | -          | -           | -                | +                               | ?                      | +/-            | +        | ?                          | +            | -                     | +                | +                          | +                   |
| <b>Geriatric assessment studied in a cross-sectional study design</b>           |          |           |              |                   |            |         |                           |             |                  |            |             |                  |                                 |                        |                |          |                            |              |                       |                  |                            |                     |
| Bearz, 2007 [42]                                                                | NA       | +         | -            | -                 | -          | -       | -                         | -           | -                | -          | -           | -                | +                               | -                      | +              | +        | NA                         | -            | -                     | +                | NA                         | -                   |
| Bylow, 2011 [43]                                                                | +        | +         | +            | +                 | +/-        | +       | +                         | +/-         | NA               | -          | -           | -                | +                               | -                      | NA             | +        | NA                         | +            | -                     | +                | -                          | +                   |
| Di Mauro, 2000 [44]                                                             | -        | -         | +/-          | +/-               | -          | -       | +/-                       | -           | NA               | -          | -           | -                | +                               | -                      | NA             | -        | NA                         | +            | -                     | -                | -                          | +                   |
| Dujon, 2006 [45]                                                                | +        | +         | +            | +                 | -          | +       | +                         | +           | -                | -          | -           | -                | +                               | -                      | +              | +        | NA                         | -            | -                     | +                | -                          | +                   |
| Extermann, 1998 [46]                                                            | +        | +         | +            | +                 | -          | +       | +                         | +           | NA               | -          | -           | NA               | +                               | -                      | NA             | +        | NA                         | +            | -                     | +                | +                          | +                   |
| Girones, 2010 [47]                                                              | +/-      | +         | +            | +                 | -          | +       | +/-                       | +           | NA               | -          | -           | -                | +                               | -                      | NA             | +        | NA                         | +/-          | -                     | +/-              | NA                         | +                   |
| Girre, 2008 [48]                                                                | +        | +         | +            | +                 | -          | +       | +/-                       | +           | NA               | -          | -           | NA               | +                               | +                      | NA             | +        | NA                         | +/-          | +                     | +                | NA                         | +                   |
| Hurria, 2005 [88]                                                               | +        | +         | +/-          | +                 | -          | +/-     | +                         | +/-         | NA               | -          | -           | +/-              | +                               | +                      | NA             | +        | NA                         | +            | +                     | +                | +                          | +/-                 |
| Hurria, 2007 [89] ††                                                            | +        | +         | +/-          | +                 | -          | +/-     | +                         | -           | NA               | -          | -           | -                | +                               | -                      | NA             | +        | NA                         | +            | +                     | +                | +                          | +/-                 |
| Hurria, 2009 [90] ††                                                            | +/-      | +         | +/-          | +                 | -          | +/-     | +                         | -           | NA               | -          | -           | -                | +                               | +                      | NA             | +        | NA                         | +            | +                     | +                | -                          | +                   |

| First author, year [reference]                                                   | Abstract | Rationale | Study design | Problem statement | Hypothesis | Setting | Definition of measurement | Eligibility | Follow-up method | Study size | Recruitment | Nonparticipation | Characteristics of participants | Amount of missing data | Follow-up time | Outcomes | Handling loss to follow-up | Measurements | Handling missing data | Reported results | Precision of study results | Statistical methods |
|----------------------------------------------------------------------------------|----------|-----------|--------------|-------------------|------------|---------|---------------------------|-------------|------------------|------------|-------------|------------------|---------------------------------|------------------------|----------------|----------|----------------------------|--------------|-----------------------|------------------|----------------------------|---------------------|
| Ingram, 2002 [85]                                                                | +        | +         | +/-          | +                 | -          | +       | +                         | +           | NA               | -          | +           | -                | +                               | ?                      | NA             | NA       | NA                         | +            | -                     | +                | NA                         | +                   |
| Kellen, 2010 [49]                                                                | +/-      | +         | +/-          | +                 | -          | -       | +                         | +/-         | NA               | -          | -           | -                | +                               | -                      | NA             | +        | NA                         | +            | -                     | +                | +                          | +                   |
| Kim, 2011 [50]                                                                   | +        | +         | +/-          | +                 | -          | +       | +                         | +           | NA               | -          | -           | -                | +                               | NA                     | NA             | +        | NA                         | +            | NA                    | +                | NA                         | +                   |
| Luciani, 2010 [51]                                                               | +        | +         | +/-          | +                 | -          | -       | +                         | +/-         | NA               | -          | -           | -                | +                               | -                      | NA             | +        | NA                         | +            | -                     | +                | +                          | +                   |
| Lynch, 2007 [52]                                                                 | -        | +         | +/-          | +                 | -          | +/-     | -                         | +           | NA               | -          | -           | -                | +/-                             | NA                     | NA             | +        | NA                         | +/-          | NA                    | +                | NA                         | -                   |
| Mantovani, 2004 [53]                                                             | +/-      | +         | -            | +                 | -          | -       | +                         | -           | NA               | -          | -           | -                | +                               | -                      | NA             | +        | NA                         | +            | -                     | +                | NA                         | +                   |
| Mohile, 2007 [78] §                                                              | +        | +         | +            | +                 | -          | +       | +                         | +           | NA               | -          | NA          | NA               | +                               | -                      | NA             | +        | NA                         | +            | -                     | +                | +                          | +                   |
| Mohile, 2009 [54]                                                                | +        | +         | +            | +                 | -          | +/-     | +                         | +           | NA               | +          | -           | -                | +                               | -                      | NA             | NA       | NA                         | +            | -                     | +                | NA                         | +                   |
| Molina-Garrido, 2011 [55]                                                        | +        | +         | +            | +                 | -          | +       | +                         | +           | NA               | +          | +/-         | NA               | +                               | NA                     | NA             | +        | NA                         | +            | NA                    | +                | +                          | +                   |
| Molina-Garrido, 2011 [56]                                                        | +        | +         | +            | +                 | -          | +       | +/-                       | +           | NA               | -          | -           | -                | +                               | NA                     | NA             | +        | NA                         | +            | NA                    | +                | NA                         | +                   |
| Monfardini, 1996 [57]                                                            | +        | +         | -            | +                 | -          | +/-     | +                         | -           | NA               | -          | -           | -                | +                               | -                      | NA             | +        | NA                         | +            | -                     | +                | -                          | +                   |
| Overcash, 2007 [58]                                                              | +/-      | +         | +            | +                 | -          | +/-     | +                         | +/-         | NA               | -          | -           | -                | +                               | NA                     | NA             | +        | NA                         | +            | -                     | +                | +                          | +/-                 |
| Overcash, 2008 [77]                                                              | -        | +         | +/-          | +                 | +          | +/-     | +                         | -           | NA               | -          | -           | -                | +                               | -                      | -              | -        | -                          | +            | -                     | +                | -                          | +                   |
| Pignata 2008 [59]                                                                | +        | +         | +            | +                 | -          | +/-     | +/-                       | +/-         | +                | +          | -           | -                | +                               | +                      | +              | +        | NA                         | +/-          | +/-                   | +                | NA                         | -                   |
| Pope, 2006 [60]†                                                                 | +        | +         | +            | +                 | -          | +       | +                         | +           | +                | -          | -           | -                | +                               | -                      | +              | +        | NA                         | +            | -                     | +                | +                          | +                   |
| Repetto, 2002 [61]                                                               | +        | +         | +            | +                 | -          | -       | +                         | +/-         | NA               | -          | -           | -                | +                               | -                      | NA             | +        | NA                         | +            | -                     | +                | +                          | +                   |
| Retornaz, 2008 [93]                                                              | +        | +         | +            | +                 | -          | +       | +                         | +           | NA               | -          | +           | -                | +                               | NA                     | NA             | +        | NA                         | +            | NA                    | +                | NA                         | +                   |
| Roche, 1997 [62]                                                                 | +        | +         | +/-          | +                 | +          | +/-     | +                         | +           | NA               | -          | ?           | ?                | +                               | -                      | NA             | +        | NA                         | +/-          | -                     | +                | NA                         | +                   |
| Serraino, 2001 [63]                                                              | +/-      | +         | +/-          | +                 | -          | +/-     | +                         | +           | NA               | -          | -           | -                | +                               | -                      | NA             | +        | NA                         | +            | -                     | -                | -                          | +                   |
| Siegel, 2006 [64]                                                                | +/-      | +         | -            | +                 | +          | +/-     | +                         | +           | NA               | -          | -           | -                | +                               | NA                     | NA             | NA       | NA                         | +            | -                     | +                | +                          | +                   |
| Stauder, 2010 [65]                                                               | +        | +         | -            | +                 | -          | +/-     | +                         | -           | NA               | -          | -           | -                | +/-                             | +                      | NA             | NA       | NA                         | +            | +                     | +                | NA                         | +                   |
| To, 2010 [66]                                                                    | +        | +         | +            | +                 | -          | +/-     | +                         | +/-         | NA               | -          | +/-         | -                | +                               | -                      | NA             | +        | NA                         | +/-          | +                     | +                | NA                         | +                   |
| Venturino, 2000 [67]                                                             | +        | +         | -            | +                 | -          | +/-     | +                         | -           | -                | -          | -           | -                | +                               | NA                     | +              | +        | +                          | +            | NA                    | +                | NA                         | -                   |
| Wedding, 2007 [68] **                                                            | +        | +         | +/-          | +                 | -          | +/-     | +                         | +/-         | NA               | -          | -           | -                | +                               | -                      | NA             | +        | NA                         | +            | -                     | +                | +                          | +                   |
| Wedding, 2007 [99]                                                               | +        | +         | +/-          | +                 | -          | +/-     | +                         | +/-         | NA               | -          | +/-         | +/-              | +                               | +                      | -              | +        | -                          | +            | +                     | +                | NA                         | +                   |
| <b>Geriatric assessment studied in a retrospective studies and chart reviews</b> |          |           |              |                   |            |         |                           |             |                  |            |             |                  |                                 |                        |                |          |                            |              |                       |                  |                            |                     |
| Barthelemy, 2011 [98]                                                            | +        | +         | +            | +                 | -          | +       | +/-                       | +           | NA               | -          | NA          | NA               | +                               | +                      | NA             | +        | NA                         | +/-          | +                     | +                | +                          | +                   |
| Basso, 2008 [79]                                                                 | +        | +         | +            | +                 | -          | +/-     | +                         | +/-         | NA               | -          | NA          | NA               | +                               | -                      | +              | +        | NA                         | +            | -                     | +                | -                          | +                   |
| Cudennec, 2007 [72]                                                              | NA       | +/-       | -            | +/-               | -          | +/-     | +/-                       | +           | NA               | -          | NA          | NA               | +/-                             | +                      | NA             | +        | NA                         | +/-          | -                     | +                | NA                         | -                   |
| Cudennec, 2010 [84]                                                              | +/-      | +         | +/-          | +                 | -          | +/-     | +                         | +/-         | NA               | -          | -           | -                | +                               | -                      | NA             | +        | NA                         | +/-          | -                     | +                | NA                         | -                   |
| Flood, 2006 [92]                                                                 | +        | +         | +            | +                 | -          | +       | +                         | +           | NA               | -          | NA          | NA               | +                               | +                      | NA             | +        | NA                         | +            | +/-                   | +                | NA                         | +/-                 |
| Fratino 1999 [69]                                                                | +/-      | +         | -            | +                 | -          | +/-     | +/-                       | +/-         | NA               | -          | -           | -                | +                               | -                      | NA             | +        | NA                         | +/-          | -                     | +/-              | +                          | -                   |
| Garman, 2004 [86]                                                                | +        | +         | +            | +                 | -          | +       | +                         | +           | NA               | -          | NA          | NA               | +/-                             | +/-                    | NA             | +        | NA                         | +            | +                     | +                | NA                         | -                   |
| Koroukian, 2006 [91] ††                                                          | +        | +         | +            | +                 | +          | +       | +                         | +           | NA               | -          | NA          | NA               | +                               | +                      | NA             | +        | NA                         | +/-          | +                     | +                | NA                         | +/-                 |
| Koroukian, 2010 [80] ††                                                          | +        | +         | +/-          | +                 | -          | +       | +                         | +           | NA               | -          | NA          | NA               | +                               | -                      | NA             | +        | NA                         | +            | -                     | +                | +                          | +                   |
| Overcash, 2005 [81] §§                                                           | +        | +         | +            | +                 | +          | +       | +                         | +           | NA               | -          | NA          | NA               | +/-                             | -                      | NA             | NA       | NA                         | +            | -                     | +                | NA                         | +                   |
| Overcash 2006 [83] §§                                                            | +        | +         | +            | +                 | -          | +/-     | +                         | +/-         | NA               | -          | NA          | NA               | +/-                             | -                      | NA             | -        | NA                         | +            | -                     | +                | NA                         | +                   |
| Retornaz, 2008 [82]                                                              | +        | +         | +            | +                 | -          | +       | +                         | +           | NA               | -          | NA          | NA               | +                               | -                      | NA             | +        | NA                         | +            | -                     | +                | NA                         | +                   |
| Rollot-Trad, 2008 [97]                                                           | +        | +         | +            | +/-               | -          | +       | +/-                       | +           | +/-              | NA         | +           | NA               | +                               | +                      | +              | +        | NA                         | +/-          | +/-                   | -                | -                          | +/-                 |
| Sorio, 2006 [70]                                                                 | -        | +         | +            | +                 | -          | -       | +/-                       | +/-         | +                | +/-        | -           | -                | +/-                             | -                      | +              | +        | NA                         | +/-          | -                     | +                | NA                         | +                   |
| Terret, 2004 [87]                                                                | +        | +         | +            | +                 | -          | +/-     | +                         | +/-         | -                | -          | -           | -                | +                               | -                      | -              | +        | NA                         | +/-          | -                     | +                | NA                         | -                   |
| Yonnet, 2008 [96]                                                                | +        | +         | +            | +                 | -          | +       | +                         | +           | NA               | NA         | NA          | NA               | +                               | +/-                    | NA             | NA       | NA                         | +            | -                     | +                | NA                         | +                   |

\*Abstract = Does the abstract provide a structured summary?; Rationale = Is the rationale for the study described in context of what is already known?; Study design = Was an a priori design provided?; Problem statement = Is the problem of interest clearly defined?; Hypothesis= Is the hypothesis clearly stated?; Setting= Are the setting, locations, relevant dates, exposure, follow-up and data collection clearly described?; Definition measurements = Are all outcomes, exposures, predictors, potential confounders and effect modifiers clearly defined?; Eligibility = Are the eligibility criteria, sources, and

methods of selection of participants clearly described?; Follow-up method = Are methods of follow-up clearly described?; Study size = Is justification provided for study size?; Recruitment = Is the number of individuals at each stage of the study reported?; Nonparticipation = Are reasons for nonparticipation at each stage reported?; Characteristics of participants = Are the characteristics of study participants reported?; Amount of missing data = Is the number of participants with missing data for each variable of interest reported?; Follow-up time = Is average and total follow-up time reported?; Outcomes = Are numbers of outcome events or summary measures over time reported?; Handling loss to follow-up = Is the method for addressing loss to follow-up described?; Measurements = For each variable of interest, are sources of data and details of method of assessment described?; Handling missing data = Is the method for handling missing data described?; Reported results = Are unadjusted and, if applicable, confounder-adjusted estimates reported for main results?; Precision of study results = Are measures of precision reported for main results?; Statistical methods = Are the statistical methods used fully described?; NA = not applicable;; + = yes; +/- = partially; - = no; ? = unclear.

†Articles reporting on the same study.

‡Articles reporting on the same study.

§Articles reporting on the same study.

||Articles reporting on the same study.

¶Articles reporting on the same study.

#Articles reporting on the same study.

\*\*Articles reporting on the same study.

††Articles reporting on the same study.

‡‡Articles reporting on the same study.

§§Articles reporting on the same study.

**Supplementary Table 2. Characteristics of included studies\***

| First author, year [reference]                                | Country                                            | Study design              | Aim of Study                                                                                                                                                                                                        | Study duration                                                    | Sample size | Mean or median age, y (SD or range) | Response rate | Cancer type or site and stage                                                                                                             |
|---------------------------------------------------------------|----------------------------------------------------|---------------------------|---------------------------------------------------------------------------------------------------------------------------------------------------------------------------------------------------------------------|-------------------------------------------------------------------|-------------|-------------------------------------|---------------|-------------------------------------------------------------------------------------------------------------------------------------------|
| <b>GA studied in a prospective observational study design</b> |                                                    |                           |                                                                                                                                                                                                                     |                                                                   |             |                                     |               |                                                                                                                                           |
| Aaldriks, 2011 [18]                                           | Netherlands                                        | Prospective observational | To assess the prognostic value of GA with respect to the probability of completing chemotherapy and survival                                                                                                        | 12 mo                                                             | 202         | Mean 77.2 (71–92)                   | NR            | Breast, lung, prostate, CRC, ovarian, upper GI, hematological, urothelial, unknown; stage NR                                              |
| Aparicio, 2011 [19]                                           | France                                             | Prospective observational | To evaluate the feasibility of MGA in gastroenterology consultation or during hospitalization and its diagnostic accuracy compared to CGA                                                                           | Until death; median survival 9.5 mo (range = 1–47 mo)             | 21          | Median 80.5 (75–87)                 | NR            | CRC, esophagus, pancreas, biliary tract, small bowel, anal; 11 patients had metastatic disease, stage for other patients was not reported |
| Arnoldi, 2007 [20]                                            | Italy                                              | Prospective observational | To apply CGA in elderly cancer patients to select which of them are eligible for oncological treatment                                                                                                              | Until death; median survival 6 mo (range = 2–18 mo)               | 153         | Mean 76 (70–91)                     | NR            | Breast, lung, prostate, CRC, gastric, esophageal, pancreas, head and neck, mesothelioma, thymus, renal, ovarian; stage 1–4                |
| Audisio, 2008 [21]†                                           | United Kingdom, Italy, Netherlands, Belgium, Japan | Prospective observational | To investigate the value of an extended CGA in assessing the suitability of elderly patients for surgical intervention                                                                                              | 30 d                                                              | 460         | Mean 76.9 (70–95)                   | NR            | Breast, GI, GU, other cancer sites not further specified; stage NR                                                                        |
| Bailey, 2003 [22]‡                                            | United Kingdom                                     | Prospective observational | To investigate the role of age and multidimensional functional status in treatment decisions for older adults with CRC                                                                                              | NR                                                                | 337         | Mean 73.5 (58–95)                   | NR            | CRC; stage NR                                                                                                                             |
| Bailey, 2004 [23]‡                                            | United Kingdom                                     | Prospective observational | To present a detailed picture of older patients' experiences of treatment for CRC                                                                                                                                   | 6 mo after surgery or 2 mo after completion of adjuvant treatment | 337         | Mean 73.5 (58–95)                   | NR            | CRC; stage NR                                                                                                                             |
| Bamias, 2007 [24]                                             | Greece                                             | Phase II trial            | To evaluate safety and efficacy of first-line gemcitabine plus carboplatin in unfit-for-cisplatin patients with advanced urothelial carcinoma and the effect on QOL and functional status of elderly patients       | Until death; median survival 8 mo                                 | 34          | Median 75.5 (57–84)                 | NR            | Urothelial, transitional cell; stage 3 and 4                                                                                              |
| Bylow, 2008 [25]§                                             | United States                                      | Prospective observational | To estimate the prevalence of functional and physical impairment among older patients receiving ADT using a CGA and to better describe the prevalence of falls in older patients with prostate cancer receiving ADT | 3 mo                                                              | 50          | Median 78 (70–92)                   | NR            | Prostate; stage 80% had biochemical recurrence                                                                                            |
| Castagneto, 2004 [26]                                         | Italy                                              | Phase II trial            | To determine response rate and toxicity of single-agent gemcitabine in previously untreated elderly patients with advanced bladder cancer and to evaluate the influence of the treatment on CGA parameters          | Until death; median follow-up 13 mo                               | 25          | Median 76 (71–87)                   | NR            | Transitional cell bladder; stage 3 and 4                                                                                                  |
| Chaibi, 2011 [27]                                             | France                                             | Prospective observational | To analyze the change in initial multidisciplinary treatment decisions in cancer patients aged 75 years after use of a CGA, consultation with a geriatrician, and the interventions of the specific oncogeriatric   | NR                                                                | 161         | Median 82.4 (73–97)                 | NR            | Breast, lung, CRCI, gynecological, GI; stage 1–4                                                                                          |

| First author, year [reference] | Country       | Study design                 | Aim of Study                                                                                                                                                                                                                                                             | Study duration                                 | Sample size | Mean or median age, y (SD or range) | Response rate | Cancer type or site and stage                                                                |
|--------------------------------|---------------|------------------------------|--------------------------------------------------------------------------------------------------------------------------------------------------------------------------------------------------------------------------------------------------------------------------|------------------------------------------------|-------------|-------------------------------------|---------------|----------------------------------------------------------------------------------------------|
|                                |               |                              | board                                                                                                                                                                                                                                                                    |                                                |             |                                     |               |                                                                                              |
| Clough-Gorr, 2010 [73]         | United States | Prospective observational    | To evaluate GA domains in relation to clinically important outcomes in older breast cancer survivors                                                                                                                                                                     | NR                                             | 660         | ≥65, 56% 70–79                      | 53%           | Breast; stage 1–3                                                                            |
| Extermann, 2004 [74]           | United States | Prospective Observational    | To assess the prevalence of geriatric problems amenable to intervention in older breast cancer patients, their incidence over 6 mo, and their interaction with cancer treatment                                                                                          | 6 mo                                           | 15          | Median 79 (72–87)                   | 68%           | Breast; stage 1 and 2                                                                        |
| Freyer, 2004 [28]              | France        | Nonrandomized clinical trial | To study the feasibility of oral idarubicin for metastatic hormone-resistant breast cancer in patients older than 70 y and to perform an MGA to search for individual factors predictive of treatment tolerance                                                          | Study terminated early after 3 deaths          | 26          | ≥70                                 | NR            | Breast; stage 4                                                                              |
| Freyer, 2005 [29]              | France        | Phase II trial               | To evaluate the ability of some CGA parameters to predict efficacy and tolerance of the carboplatin + cyclophosphamide to identify which older patient can receive standard treatment vs dose-reduced vs treatment not considered to be beneficial for the older patient | 40 mo after study entry, median survival 22 mo | 83          | Median 76 (70–90)                   | NR            | Ovarian; stage 3 and 4                                                                       |
| Fukuse, 2005 [100]             | Japan         | Prospective observational    | To assess the prognostic value of CGA in the prediction of postoperative outcome for older patients undergoing thoracic surgery                                                                                                                                          | 90 days after surgery                          | 120         | Mean 70.3 (60–84)                   | 100%          | Lung, 29 study participants had no cancer; stage NR                                          |
| Hurria, 2006 [30]              | United States | Nonrandomized clinical trial | To evaluate the pharmacokinetics of weekly docetaxel in a cohort of older patients with metastatic cancer and to explore the relationship of pharmacokinetic variables, erythromycin breath test, GA variables, and toxicity to therapy                                  | NA                                             | 20          | Median 75 (66–84)                   | NR            | Breast; stage 4                                                                              |
| Hurria, 2006 [31]              | United States | Prospective observational    | To report on the longitudinal cognitive functioning of older women receiving adjuvant chemotherapy for breast cancer                                                                                                                                                     | 6 mo after completion of chemotherapy          | 31          | Mean 71 (65–84)                     | NR            | Breast, GI, GU, gynecologic, lymphoma, other cancer sites not further specified; stage 1–3   |
| Hurria, 2006 [32]              | United States | Prospective observational    | To examine the toxicity experienced by a cohort of older women receiving adjuvant chemotherapy for breast cancer and the longitudinal effect on their functional status and QOL                                                                                          | 6 mo after treatment completion                | 49          | Median 68 (65–84)                   | NR            | Breast, GI, GU, lymphoma, other cancer sites not further specified; stage 1–3                |
| Kothari, 2011 [33]             | United States | Prospective observational    | To determine if individual questions from the GDS and NSI NHC, and individual ADL and IADLs could successfully estimate surgical risk in geriatric patients                                                                                                              | NR                                             | 60          | Median 76 (IQR 72–80)               | NR            | Lung, esophageal, plural, thymus; stage NR                                                   |
| Kristjansson, 2010 [75]¶       | Norway        | Prospective observational    | To examine the association between the outcomes of a pre-operative CGA and the risk of severe post-operative complications in elderly patients who underwent elective surgery for CRC                                                                                    | 3 mo                                           | 182         | Median 80 (70–94)                   | 98%           | CRC; stage 1–4                                                                               |
| Kristjansson, 2010 [71]¶       | Norway        | Prospective observational    | To identify independent predictors from a CGA and ECOG PS of postoperative complications and early mortality in elderly patients operated on for CRC                                                                                                                     | Median follow-up 20 mo                         | 182         | Median 80 (70–94)                   | 98%           | CRC; stage 1–4                                                                               |
| Marenco, 2008 [34]             | Italy         | Prospective observational    | To evaluate the role of MGA as an aid in treatment decision making                                                                                                                                                                                                       | 60 mo                                          | 571         | Median 78                           | NR            | Breast, lung, prostate, GI, kidney, bladder, other cancer sites not further specified; stage |

| First author, year [reference]                      | Country       | Study design                 | Aim of Study                                                                                                                                                                                                                                                                                                                                                              | Study duration                                                                | Sample size             | Mean or median age, y (SD or range)                       | Response rate | Cancer type or site and stage                                                                                                                                |
|-----------------------------------------------------|---------------|------------------------------|---------------------------------------------------------------------------------------------------------------------------------------------------------------------------------------------------------------------------------------------------------------------------------------------------------------------------------------------------------------------------|-------------------------------------------------------------------------------|-------------------------|-----------------------------------------------------------|---------------|--------------------------------------------------------------------------------------------------------------------------------------------------------------|
|                                                     |               |                              |                                                                                                                                                                                                                                                                                                                                                                           |                                                                               |                         |                                                           |               | 1-4                                                                                                                                                          |
| Marinello, 2009 [35]                                | Italy         | Prospective observational    | To analyze the role of CGA and KPS in predicting the occurrence of adverse events during chemotherapy in a cohort of elderly cancer patients                                                                                                                                                                                                                              | 6 mo                                                                          | 110                     | Mean 75.1 (70-87)                                         | NR            | Breast, lung, CRC; stage 4                                                                                                                                   |
| Massa, 2006 [36]                                    | Italy         | Prospective observational    | To examine the relationship between changes in hemoglobin levels following rHuEPO treatment and changes in cognitive functioning in elderly cancer patients undergoing chemotherapy treatment and to assess the relationship between changes in hemoglobin levels following rHuEPO treatment and changes in functions studied by the CGA, such as ADL, IADL, GDS, and MNA | 12 wk                                                                         | 10                      | Mean 71.4 (68-75)                                         | NR            | Breast, lung, CRC, stomach, ovarian, oral, endometrial; stage 4                                                                                              |
| Massa, 2008 [76]                                    | Italy         | Phase II trial               | To examine the correlation between a specific MGA category and an appropriately preventively established treatment and clinical outcome in a population of elderly cancer patients                                                                                                                                                                                        | 3 mo after treatment                                                          | 75                      | Mean 73.1 (65-83)                                         | 80%           | Breast, lung, CRC, head and neck, gynecologic; stage 3 and 4                                                                                                 |
| Presant, 2005 [37]                                  | United States | Prospective observational    | A geriatric oncology module was developed that could be applied in oncology practice and tested in a weekly chemotherapy program                                                                                                                                                                                                                                          | Overall median survival 23.5 mo                                               | 26                      | Median 75 (65-87)                                         | NR            | Breast, lung, prostate, ovarian, endometrium, lymphoma, GI, unknown primary; stage 4 or recurrence                                                           |
| Puts, 2011 [95]#                                    | Canada        | Prospective observational    | To explore the association between frailty and functional status and treatment toxicity at 3 and 6 mo and mortality at 6 mo                                                                                                                                                                                                                                               | 6 mo                                                                          | 112                     | Median 74.1 (65-92)                                       | 72%           | Breast, lung, CRC, lymphoma, MM; stage 1-4                                                                                                                   |
| Puts, 2010 [94]#                                    | Canada        | Prospective observational    | To investigate whether frailty predicts hospitalization, emergency room visits, and visits to a general practitioner                                                                                                                                                                                                                                                      | 12 mo                                                                         | 112                     | Mean 74.1 (65-92)                                         | 72%           | Breast, lung, CRC, lymphoma, MM; stage 1-4                                                                                                                   |
| Rao, 2005 [38]                                      | United States | Randomized controlled trial  | To investigate whether frail elderly cancer patients have better QOL outcomes if cared for in a geriatric inpatient unit                                                                                                                                                                                                                                                  | 1 y                                                                           | 99                      | Mean 74                                                   | NR            | Lung, prostate, CRC, hematologic, head and neck, bladder, renal; stage NR                                                                                    |
| Tredan, 2007 [39]                                   | France        | Nonrandomized clinical trial | To analyze the results of two prospective trials to address whether CP has a favorable or unfavorable effect on tolerance and overall survival in elderly women with advanced ovarian cancer compared with CC                                                                                                                                                             | Median survival 23 mo                                                         | 83 Trial I, 75 Trial II | Median trial I: 76 (70-90)<br>Median trial II: 75 (70-89) | NR            | Ovarian epithelial carcinoma; stage 3 and 4                                                                                                                  |
| Tucci, 2009 [40]                                    | Italy         | Prospective observational    | To analyze if CGA could objectively identify elderly patients with DLCL who can be effectively treated with anthracycline-containing immunotherapy                                                                                                                                                                                                                        | Median survival unfit patients 8 mo; median survival fit patients not reached | 84                      | Median 73 (66-89)                                         | NR            | Diffuse large cell lymphoma; stage 3 and 4                                                                                                                   |
| Wedding, 2007 [41]**                                | Germany       | Prospective observational    | To investigate whether age, severe comorbidity, and functional impairment independently contribute to poor survival                                                                                                                                                                                                                                                       | Median survival 34.2 mo                                                       | 427                     | NR                                                        | NR            | Breast, lung, carcinoma of unknown primary, sarcoma, MM, GI, lymphoma, acute leukemia, chronic leukemia, other cancer sites not further specified; stage 1-4 |
| <b>GA studied in a cross-sectional study design</b> |               |                              |                                                                                                                                                                                                                                                                                                                                                                           |                                                                               |                         |                                                           |               |                                                                                                                                                              |

| First author, year [reference] | Country              | Study design                  | Aim of Study                                                                                                                                                                                                       | Study duration | Sample size | Mean or median age, y (SD or range)                              | Response rate | Cancer type or site and stage                                                                                                          |
|--------------------------------|----------------------|-------------------------------|--------------------------------------------------------------------------------------------------------------------------------------------------------------------------------------------------------------------|----------------|-------------|------------------------------------------------------------------|---------------|----------------------------------------------------------------------------------------------------------------------------------------|
| Bearz, 2007 [42]               | Italy                | NR                            | To describe the use of gefitinib in the treatment of elderly patients with advanced non-small cell lung cancer                                                                                                     | 14 mo          | 22          | >70 (4 subjects $\geq$ 80)                                       | NR            | Lung; stage 3 and 4                                                                                                                    |
| Bylow, 2011 [43]               | United States        | Case-control                  | To measure the specific contribution of ADT to frailty, objective physical performance measures, and falls in older prostate cancer patients with biochemical recurrence                                           | NA             | 134         | Case patients: mean 72 (SD 7.0); Control subjects: 70.5 (SD 6.3) | NR            | Prostate; stage biochemical recurrence                                                                                                 |
| Di Mauro, 2000 [44]            | Italy                | Case-control                  | To evaluate the role of comorbidity and psychoaffective attitudes in elderly oncological patients compared with elderly subjects without cancer                                                                    | NR             | 108         | Mean 71.4 (SD 5.5)                                               | NR            | Breast, lung, prostate, CRC, hematologic, liver, brain, urinary system; stage 1-4                                                      |
| Dujon, 2006 [45]               | France               | Cross-sectional observational | To evaluate whether performance status correlates with the geriatric indices in elderly patients with lung cancer                                                                                                  | NA             | 41          | Mean 75.6 (65-90)                                                | NR            | Lung; stage 1-4                                                                                                                        |
| Extermann, 1998 [46]           | United States        | Cross-sectional observational | To compare the performance of the CCI and the CIRS-G in a cohort of elderly cancer patients who prospectively underwent CGA as part of their initial oncologic evaluation                                          | NA             | 203         | Median 75 (63-91)                                                | NR            | Breast, lung, GI, hematologic, other cancer sites not further specified; stage 1-4                                                     |
| Girones, 2010 [47]             | Spain                | Cross-sectional observational | To assess the prevalence of other comorbidities and of functional impairment in elderly patients on follow-up after curative treatment of early breast cancer and the feasibility of assessment in outpatient unit | NA             | 91          | Mean 80 (71-95)                                                  | NR            | Breast; stage 1-3                                                                                                                      |
| Girre, 2008 [48]               | France               | Cross-sectional observational | To describe the patient population and the treatment plan modification after a geriatric oncology clinic in older cancer patients referred to Institut Curie                                                       | NA             | 105         | Median 79 (70-97)                                                | NR            | Breast, lung, prostate, CRC, cervical, endometrial, ovarian, choroidal, hematologic, other cancer sites not further specified; stage 4 |
| Hurria, 2005 [88]              | United States        | Cross-sectional observational | To develop a brief cancer-specific GA measure and determine its feasibility by 1) the percentage of patients able to complete it on their own, 2) length of time to complete, and 3) patient satisfaction          | NA             | 40          | Mean 74 (65-87)                                                  | 83%           | Breast, lung, CRC; stage 1-4                                                                                                           |
| Hurria, 2007 [89]††            | United States        | Cross-sectional observational | To integrate the principles of GA into the care of older adults with cancer to identify vulnerable older adults and develop interventions to optimize cancer treatment                                             | NA             | 245         | Mean 76 (SD 7, 65-95)                                            | 98%           | Breast, lung, CRC, lymphoma; stage 1-4                                                                                                 |
| Hurria, 2009 [90]††            | United States        | Cross-sectional observational | To determine predictors of distress in older patients with cancer                                                                                                                                                  | NA             | 245         | Mean 76, (65-95)                                                 | 98%           | Breast, lung, CRC, lymphoma; stage 1-4                                                                                                 |
| Ingram, 2002 [85]              | United States        | Cross-sectional observational | To assess the ability of cancer patients to complete a comprehensive assessment tool in their own homes and return the surveys during follow-up clinic appointments and to profile this population                 | NA             | 154         | Mean 68 (42-87)                                                  | 58%           | Breast, lung, prostate, CRC, head and neck, lymphoma, leukemia, melanoma; stage 1-4                                                    |
| Kellen, 2010 [49]              | Belgium, Netherlands | Cross-sectional observational | To compare the results of three selected prescreenings tools, currently insufficiently validated, using the results from the entire CGA as the gold standard                                                       | NA             | 113         | Mean 77 (SD 4)                                                   | NR            | Breast, lung, prostate, CRC, other cancer sites not further specified; stage NR                                                        |
| Kim, 2011 [50]                 | Korea                | Cross-sectional observational | To analyze the baseline CGA and quality of life in Korean elderly cancer patients receiving systemic chemotherapy                                                                                                  | NA             | 65          | Median 71 (65-80)                                                | NR            | Lung, GI, gynecologic and GU, melanoma; stage 1-4                                                                                      |
| Luciani, 2010 [51]             | Italy                | Cross-sectional               | To establish the accuracy of the VES-13 in                                                                                                                                                                         | NA             | 419         | Mean 76                                                          | NR            | Solid or hematologic tumor;                                                                                                            |

| First author, year [reference] | Country       | Study design                  | Aim of Study                                                                                                                                                                                                                                                                                                              | Study duration | Sample size                                        | Mean or median age, y (SD or range)                                                                                                                                                                            | Response rate | Cancer type or site and stage                                                                                                                             |
|--------------------------------|---------------|-------------------------------|---------------------------------------------------------------------------------------------------------------------------------------------------------------------------------------------------------------------------------------------------------------------------------------------------------------------------|----------------|----------------------------------------------------|----------------------------------------------------------------------------------------------------------------------------------------------------------------------------------------------------------------|---------------|-----------------------------------------------------------------------------------------------------------------------------------------------------------|
|                                |               | observational                 | predicting the presence of abnormalities at CGA                                                                                                                                                                                                                                                                           |                |                                                    | (70–97)                                                                                                                                                                                                        |               | stage NR                                                                                                                                                  |
| Lynch, 2007 [52]               | United States | Cross-sectional observational | To describe a clinical pilot program in a community cancer center                                                                                                                                                                                                                                                         | NA             | 85                                                 | 41 subjects >75 y, 23 subjects 70–74 y, 21 subjects 65–69 y                                                                                                                                                    | NR            | Breast, lung, prostate, bladder, GI, CLL, head and neck, melanoma, MM, NHL, ovarian, sarcoma, uterine, Other cancer sites not further specified; stage NR |
| Mantovani, 2004 [53]           | Italy         | Cross-sectional observational | To find whether any association exists between serum levels of proinflammatory cytokines and the most important CGA variables, such as functional status, cognitive functions, and nutrition                                                                                                                              | NA             | 84 older cancer patients, 59 adult cancer patients | Mean 72.8 (65–96)                                                                                                                                                                                              | NR            | Breast, lung, prostate, head and neck, endometrium, NHL, GI, ovarian, other cancer sites not further specified; stage 1–4                                 |
| Mohile, 2007 [78]§             | United States | Cross-sectional observational | To evaluate the validity of the VES–13 for identifying impairment compared to CGA in older patients with prostate cancer in the oncology setting                                                                                                                                                                          | 1 mo           | 50                                                 | Median 78 (70–92)                                                                                                                                                                                              | NR            | Prostate; stage 80% had no evidence of metastatic disease by imaging criteria                                                                             |
| Mohile, 2009 [54]              | United States | Cross-sectional observational | To evaluate whether cancer was independently associated with vulnerability and frailty                                                                                                                                                                                                                                    | NA             | 12,480                                             | Mean 76.2                                                                                                                                                                                                      | NR            | Breast, lung, prostate, CRC, cervical, uterine, bladder, ovarian, other cancer sites not further specified; stage NR                                      |
| Molina–Garrido, 2011 [55]      | Spain         | Cross-sectional observational | To test two frailty screening tools to select patients who may benefit from CGA                                                                                                                                                                                                                                           | NA             | 41                                                 | Mean 74.5 (66.5–87.5)                                                                                                                                                                                          | NR            | Breast; stage 1 and 2                                                                                                                                     |
| Molina–Garrido, 2011 [56]      | Spain         | Cross-sectional observational | To develop a brief cancer-specific CGA measure that would be primarily non–self-administered and to establish its feasibility                                                                                                                                                                                             | NA             | 99                                                 | Mean 78.65 (70.4–94.9)                                                                                                                                                                                         | NR            | Breast, lung, colorectal, urologic, hematologic, digestive, other cancer sites not further specified; stage 1–4                                           |
| Monfardini, 1996 [57]          | Italy         | Cross-sectional observational | To assess the reliability and validity of a MGA protocol                                                                                                                                                                                                                                                                  | 1 wk           | 30                                                 | Mean 70.2                                                                                                                                                                                                      | NR            | Breast, lung, prostate, NHL, AML, MM, head and neck, bladder; stage NR                                                                                    |
| Overcash, 2007 [58]            | United States | Cross-sectional observational | To determine the extent to which falls occur in older adults with cancer; to identify how falls relate to depression, age, functional status, and cognition, and to develop a model for predicting falls                                                                                                                  | NA             | 165                                                | Mean 77.6                                                                                                                                                                                                      | NR            | Breast, prostate, colorectal, lymphoma, other cancer sites not further specified; stage 1–4                                                               |
| Overcash, 2008 [77]            | United States | Cross-sectional observational | Of the multiple research questions, the most important was: What components of the CGA predict falls in three groups of older adults aged 70 y (group 1 included cancer patients receiving chemotherapy, group 2 included cancer patients not receiving chemotherapy and group 3 included older patients without cancer)? | NA             | 352                                                | Mean age group 1 (cancer patients who were receiving chemotherapy) 76.9, mean age group 2 (cancer patients who were not receiving chemotherapy) 77.8, and mean age group 3 (older adults group without cancer) | NA            | Breast, prostate, lymphoma, leukemia, head and neck, cervical, GI, other cancer sites not further specified; stage NR                                     |



| First author, year [reference] | Country        | Study design                  | Aim of Study                                                                                                                                                                                                  | Study duration                            | Sample size | Mean or median age, y (SD or range)                                              | Response rate | Cancer type or site and stage                                                                                                                                |
|--------------------------------|----------------|-------------------------------|---------------------------------------------------------------------------------------------------------------------------------------------------------------------------------------------------------------|-------------------------------------------|-------------|----------------------------------------------------------------------------------|---------------|--------------------------------------------------------------------------------------------------------------------------------------------------------------|
|                                |                |                               |                                                                                                                                                                                                               |                                           |             | treatments)<br>80.1                                                              |               |                                                                                                                                                              |
| Pignata, 2008 [59]             | Italy          | Phase II trial                | To describe the safety of a weekly schedule of carboplatin (AUC2) and paclitaxel (60 mg/m <sup>2</sup> ) in ovarian cancer patients older than 70 y                                                           | Median follow-up 34 mo (range = 24–52 mo) | 26          | Median 77 (70–84)                                                                | NR            | Epithelial, ovarian; stage 1–4                                                                                                                               |
| Pope, 2006 [60]†               | PACE countries | Cross-sectional observational | To describe the population, and present the association between components of PACE and number of comorbidities (defined according to SIC)                                                                     | NA                                        | 460         | Mean 76.9 (70–95)                                                                | NR            | Breast, GI, GU, other cancer sites not further specified; stage 1–4                                                                                          |
| Repetto, 2002 [61]             | Italy          | Cross-sectional observational | To appraise the performance of a CGA in elderly cancer patients and to evaluate whether it could add further information with respect to the ECOG PS                                                          | NA                                        | 363         | Median 72.9 (65–92)                                                              | NR            | Breast, lung, CRC, hematologic, head and neck, other cancer sites not further specified; stage 1–4                                                           |
| Retornaz, 2008 [93]            | Canada         | Cross-sectional observational | To assess the prevalence of seven frailty markers in older cancer patients referred to oncology for chemotherapy and to classify patients in hierarchical groups based on functional status                   | NA                                        | 50          | Mean 76.8, SD 5.2                                                                | 94%           | Breast, lung, prostate, CRC, leukemia, other cancer sites not further specified; stage 1–4                                                                   |
| Roche, 1997 [62]               | United States  | Cross-sectional observational | To evaluate the role of cognitive, functional, and affective GA measures in elderly cancer patients, and to analyze the associations between these factors, stage of malignancy, and cancer treatment choices | NA                                        | 50          | Mean 74.9 (65–93)                                                                | NR            | Breast, lung, prostate, GI, hematologic, gynecologic, meningioma, head and neck, sarcoma, unknown primary, bladder, paraganglioma; stage 3 and 4             |
| Serraino, 2001 [63]            | Italy          | Cross-sectional observational | To assess the prevalence of functional limitations and to identify factors associated with the presence of functional limitations                                                                             | NA                                        | 303         | Median 72 (65–94)                                                                | NR            | Breast, lung, head and neck, HD, MM, MDS, acute and chronic leukemia, other cancers not further specified; stage NR                                          |
| Siegel, 2006 [64]              | United States  | Cross-sectional observational | To establish the range of three tests (TUG, hand grip, and Tinetti gait and balance) in older patients with lymphoma                                                                                          | NA                                        | 25          | Median 70 (60–85)                                                                | NR            | Lymphoma; stage NR                                                                                                                                           |
| Stauder, 2010 [65]             | Austria        | Cross-sectional observational | To assess the coverage of a large battery of GA instruments by determining the number of independent domains measured                                                                                         | NA                                        | 78          | Median 72.5 (60–93)                                                              | NR            | Breast, lung, DLBCL, MDS, AML, CML, renal cell, bladder, GI, mesothelioma, leiomyosarcoma, unknown primary; stage NR                                         |
| To, 2010 [66]                  | Australia      | Cross-sectional observational | To describe the characteristics of the first 200 patients seen at the geriatric oncology clinic                                                                                                               | NA                                        | 200         | Mean 76.7 (70–92)                                                                | NR            | Breast, lung, GU, other cancer sites not further specified; stage 1–4                                                                                        |
| Venturino, 2000 [67]           | Italy          | Nonrandomized clinical trial  | To examine formestane toxicity and activity in an elderly breast cancer population presenting with disability and comorbidity                                                                                 | NA                                        | 45          | Median 74 (65–93)                                                                | NR            | Breast; stage 4                                                                                                                                              |
| Wedding, 2007[68]**            | Germany        | Cross-sectional observational | To investigate the independent contribution of functional impairment and comorbidity to QOL                                                                                                                   | NA                                        | 477         | Group A Mean 70.2, SD 6.9; Group B: mean 46, SD 11.3; Group C: mean 71.4, SD 7.0 | NR            | Breast, lung, carcinoma of unknown primary, sarcoma, MM, lymphoma, acute leukemia, chronic leukemia, GI, other cancer sites not further specified; stage 1–4 |
| Wedding, 2007 [99]             | Germany        | Randomized controlled trial   | To examine whether CGA identifies more precisely subjects who are fit and frail compared with physicians judgment                                                                                             | NA                                        | 200         | Mean 75.9 (70–94)                                                                | 94%           | Breast, lung, prostate, hematologic, GI, ovarian, bladder, skin, larynx; stage NR                                                                            |

| First author, year [reference]                               | Country       | Study design                  | Aim of Study                                                                                                                                                                                                                                              | Study duration                         | Sample size                  | Mean or median age, y (SD or range)                       | Response rate | Cancer type or site and stage                                                                                                                                                         |
|--------------------------------------------------------------|---------------|-------------------------------|-----------------------------------------------------------------------------------------------------------------------------------------------------------------------------------------------------------------------------------------------------------|----------------------------------------|------------------------------|-----------------------------------------------------------|---------------|---------------------------------------------------------------------------------------------------------------------------------------------------------------------------------------|
| <b>GA studied in retrospective studies and chart reviews</b> |               |                               |                                                                                                                                                                                                                                                           |                                        |                              |                                                           |               |                                                                                                                                                                                       |
| Barthelemy, 2011 [98]                                        | France        | Retrospective                 | To evaluate the impact of GA vs age and other prognostic factors on the tumor board proposal with regard to adjuvant chemotherapy for elderly breast cancer patient                                                                                       | NA                                     | 192, 93 underwent GA         | Median 75.1 (70–98)                                       | NA            | Breast; stage 1 and 2                                                                                                                                                                 |
| Basso, 2008 [79]                                             | Italy         | Retrospective                 | To evaluate management and outcome of patients aged 70 years or older admitted to a medical oncology ward and evaluated by MGA before treatment with standard or "elderly-friendly" chemotherapy regimens                                                 | Until death; median follow-up 19 mo    | 117                          | Median 75 (70–92)                                         | NA            | Breast, lung, CRC, ovarian, head and neck, other cancer sites not further specified; stage 1–4                                                                                        |
| Cudennec, 2007 [72]                                          | France        | Retrospective                 | To describe results from the GA                                                                                                                                                                                                                           | NA                                     | 124                          | Mean 79, SD 6)                                            | NA            | GI; stage NR                                                                                                                                                                          |
| Cudennec, 2010 [84]                                          | France        | Retrospective                 | To describe the SGE and its use in patients with thoracic cancer                                                                                                                                                                                          | NA                                     | 57                           | mean 80.8, SD 5.7                                         | NA            | Bronchial; stage NR                                                                                                                                                                   |
| Fratino, 1999 [69]                                           | Italy         | Retrospective                 | To investigate physical, psychological and mental disabilities using a CGA, and to correlate the objective measurements with standard clinical parameters in older adults                                                                                 | NR                                     | 383                          | Median 72 (65–94)                                         | NR            | Breast, lung, CRC, hematologic, other cancer sites not further specified; stage 1–4                                                                                                   |
| Flood, 2006 [92]                                             | United States | Retrospective                 | To characterize an elderly population admitted to a novel Oncology–Acute Care for Elders Unit in terms of the prevalence of functional dependencies and geriatric syndromes, and examine the patient's suitability for an interdisciplinary model of care | NA                                     | 119                          | Mean 74.1, SD 5.9                                         | NA            | Breast, lung, prostate, CRC, hematologic, carcinoid, glioblastoma multiforme, head and neck, bladder, melanoma, sarcoma, thyroid, renal cell, unknown primary; stage NR               |
| Garman, 2004 [86]                                            | United States | Retrospective                 | To describe patterns of functional status, symptoms, therapeutic goals, and outcomes among older adults with cancer diagnoses hospitalized on a Geriatric Evaluation and Management Unit                                                                  | NA                                     | 102 admitted, 36 with cancer | Mean 80, SD 5                                             | NA            | Lung, Prostate, CRC, Skin, Gastric, Tonsillar, Lymphoma, MM, Pineal, stage NR                                                                                                         |
| Koroukian, 2006 [91]##                                       | United States | Cross-sectional observational | To describe the rates and overlap of comorbidity, disability, and geriatric syndromes in a cohort of elderly cancer patients receiving home health care                                                                                                   | NA                                     | 2552                         | Mean 76.6 for breast, 79.3 for prostate, and 77.9 for CRC | NA            | Breast, Prostate, CRC, stage 1–4                                                                                                                                                      |
| Koroukian, 2010 [80] ##                                      | United States | Cross-sectional observational | To examine patterns of CRC treatment and survival in relation to comorbidities, functional limitations, and geriatric syndromes                                                                                                                           | Follow-up until death or December 2005 | 1009                         | ≥65                                                       | NA            | CRC, stage 1–4                                                                                                                                                                        |
| Overcash, 2005 [81]\$\$                                      | United States | Retrospective                 | To understand what items contained in the instruments that make up the CGA could be compiled to construct an abbreviated form of the CGA                                                                                                                  | NA                                     | 513                          | Mean 73 (70–92)                                           | NA            | Breast, prostate, lymphoma, leukemia, head and neck, cervical, GI, and other cancer sites not further specified; stage NR                                                             |
| Overcash, 2006 [83]\$\$                                      | United States | Retrospective                 | To develop cut points for scoring the aCGA that are consistent with existing limitations as revealed by the full CGA                                                                                                                                      | NA                                     | 500                          | Mean 73 (70–92)                                           | NA            | Breast, prostate, lymphoma, leukemia, GI, and other cancer sites not further specified; stage NR                                                                                      |
| Retornaz, 2008 [82]                                          | France        | Retrospective                 | To characterize the elderly population admitted to an Acute Care for Elders Unit and to determine their care and disease trajectory as well as the prevalence of functional dependencies                                                                  | NA                                     | 186                          | Mean 79.5, SD 7.4                                         | NA            | Breast, lung, prostate, CRC, gynecologic, GI, urologic, and other cancer sites not further specified; 70 patients had stage 70 stage 4, for the other study participants stage was NR |

| First author, year [reference] | Country | Study design   | Aim of Study                                                                                                                                                                                        | Study duration                         | Sample size | Mean or median age, y (SD or range) | Response rate | Cancer type or site and stage                                                        |
|--------------------------------|---------|----------------|-----------------------------------------------------------------------------------------------------------------------------------------------------------------------------------------------------|----------------------------------------|-------------|-------------------------------------|---------------|--------------------------------------------------------------------------------------|
| Rollot-Trad, 2008 [97]         | France  | Retrospective  | To describe a series of 54 patients with blood diseases who were followed up in an acute care geriatric department                                                                                  | 0-60 mo (until death)                  | 54          | Mean 86 (75-99)                     | NA            | NHL, MDS, AML, ALL, CLL, MM, HD, other cancer sites not further specified; stage 1-4 |
| Sorio, 2006 [70]               | Italy   | Phase II trial | To evaluate response rate, toxicity, and feasibility of therapeutic drug monitoring in elderly patients with advanced NSCLC in a phase II trial of prolonged orally administered etoposide          | Median survival 6 mo (range = 1-20 mo) | 17          | Median 70 (65-80)                   | NR            | Lung; stage 3 and 4                                                                  |
| Terret, 2004 [87]              | France  | Retrospective  | To describe patient characteristics identified by a geriatric oncology program and to focus attention on elderly patients with prostate cancer who were prospectively evaluated through the program | NA                                     | 60          | Median 78 (68-92)                   | NR            | Prostate; stage 1-4                                                                  |
| Yonnet, 2008 [96]              | France  | Retrospective  | To evaluate the role of age in the management of patients diagnosed with primary lung cancer                                                                                                        | NA                                     | 363         | 31.9% ≥70                           | NA            | Lung; stage 3 and 4                                                                  |

\*NR = not reported; NA = not applicable; aCGA = abbreviated geriatric assessment; ADL = activities of daily living; ADT = androgen deprivation therapy; ALL= Acute Lymphoblastic Leukemia; AML= Acute Myeloid Leukemia; AUC2= Area Under the Curve for Carboplatin according to the Calvert Formula; CGA = comprehensive geriatric assessment; CC = carboplatin plus cyclophosphamide; CLL= Chronic Lymphoblastic Leukemia; CML= Chronic Myeloid Leukemia; CP = carboplatin plus paclitaxel; CIRS-G = Cumulative Illness Rating Scale-Geriatric; CRC=Colorectal Cancer DLCL = diffuse large cell lymphoma; ECOG PS= Eastern Collaborative Group Oncology performance status; GA= geriatric assessment; GDS = Geriatric Depression Scale; GI = gastrointestinal cancer; GU = genitourinary cancer; HD=Hodgkin Disease; IADL = instrumental activities of daily living; IQR= interquartile range; KPS= Karnofsky Performance Status; MDS= Myelodysplastic Syndrome; MGA = multidimensional geriatric assessment; MM= Multiple Myeloma; MNA= Mini Nutritional Assessment; MO= months; NHL=non-Hodgkin Lymphoma; NSCLC = non-small cell lung cancer; NSI NHC= Nutrition Screening Initiative Nutritional Health Checklist; PACE = Pre-operative Assessment of Cancer in the Elderly; QOL = quality of life; rHuEPO= Recombinant Human Erythropoietin; SIC = Satariano Index for comorbidities ;TUG = timed up and go test; SGE= Simplified Geriatric Evaluation; VES-13 = Vulnerable Elder Survey 13 items.

†Articles reporting on the same study.

‡Articles reporting on the same study.

§Articles reporting on the same study.

||Articles reporting on the same study.

¶Articles reporting on the same study.

#Articles reporting on the same study.

\*\*Articles reporting on the same study.

††Articles reporting on the same study.

‡‡Articles reporting on the same study.

§§Articles reporting on the same study.

**Supplementary Table 3.** Detailed content and domains of the geriatric assessment instruments used in each study\*

| First author, year [reference]                                           | Name of assessment(s)     | ADL                     | IADL                                | Comorbidity                       | Cognitive functioning                                      | Mood                                 | Nutrition                                                                            | Other instruments and/or domains                                                                                                                                                 | Summary score                                                                       |
|--------------------------------------------------------------------------|---------------------------|-------------------------|-------------------------------------|-----------------------------------|------------------------------------------------------------|--------------------------------------|--------------------------------------------------------------------------------------|----------------------------------------------------------------------------------------------------------------------------------------------------------------------------------|-------------------------------------------------------------------------------------|
| <b>Geriatric assessment studied in prospective observational studies</b> |                           |                         |                                     |                                   |                                                            |                                      |                                                                                      |                                                                                                                                                                                  |                                                                                     |
| Aaldriks, 2011 [18]                                                      | CGA, geriatric assessment | Yes, included in GFI    | Yes, included in GFI                | No                                | Yes, MMSE and IQCODE                                       | No                                   | Yes, nutritional assessment (MNA)                                                    | GFI                                                                                                                                                                              | Yes, using GFI                                                                      |
| Aparicio, 2011 [19]                                                      | CGA, minimal CGA          | Yes, Katz Index         | Yes, Lawton-Brody Scale             | Yes, CIRS-G                       | Yes, MMSE                                                  | Yes, GDS (1 item)                    | Yes, nutritional assessment (MNA)                                                    | Social Support (tool not specified), medications (tool not specified), fall assessment (history of falls, stand on one leg test)                                                 | No                                                                                  |
| Arnoldi, 2007 [20]                                                       | CGA                       | Yes, Barthel Index      | Yes, Lawton Scale                   | Yes, CCI                          | Yes, MMSE                                                  | Yes, GDS (version NR)                | Yes, nutritional assessment (BMI)                                                    | PS (ECOG, Karnofsky)                                                                                                                                                             | Yes, Balducci classification of frail or vulnerable vs fit                          |
| Audisio, 2008 [21]†                                                      | PACE, CGA                 | Yes, Katz Index         | Yes, Lawton-Brody Scale             | Yes, SIC                          | Yes, MMSE                                                  | Yes, GDS (15 items)                  | No                                                                                   | Fatigue (Brief Fatigue inventory), PS (ECOG), ASA Scale                                                                                                                          | No                                                                                  |
| Bailey, 2003 [22]‡<br>Bailey, 2004 [23]‡                                 | Functional status         | Yes, included in OARS   | Yes, OARS and Reuben exercise scale | Yes, OARS physical health section | No                                                         | Yes, Mental Health (OARS)            | No                                                                                   | Social support (OARS), QOL (Rotterdam Symptom Checklist), economics resources (OARS), activity level (Rotterdam Symptom Checklist)                                               | No                                                                                  |
| Bamias, 2007 [24]                                                        | Geriatric assessment      | Yes, Katz Index         | Yes, Lawton Scale                   | Yes, CCI                          | No                                                         | No                                   | No                                                                                   | PS (ECOG), VES-13                                                                                                                                                                | Yes, Balducci classification of frail or vulnerable vs fit                          |
| Bylow, 2008 [25]§                                                        | CGA                       | Yes, Katz Index         | Yes, Lawton Scale                   | Yes, CCI                          | Yes, SPMSQ                                                 | No                                   | Yes, nutritional assessment (MNA)                                                    | Social support (MOS), medications (number), fall assessment (history of falls), gait speed (SPPB), fatigue (SF36), VES-13                                                        | Yes Balducci classification of frail or vulnerable vs fit                           |
| Castagneto, 2004 [26]                                                    | CGA                       | Yes, Katz Index         | Yes, Lawton Scale                   | No                                | No                                                         | Yes, GDS (30 items)                  | No                                                                                   | No                                                                                                                                                                               | Yes, increase, no change, or improvement in the number of positive CGA parameters   |
| Chaibi, 2011 [27]                                                        | CGA                       | Yes, Katz Index         | Yes, Lawton-Brody Scale             | Yes, CIRS-G                       | Yes MMSE, clock-drawing test, and five-word screening test | Yes, GDS (15-items)                  | Yes, nutritional assessment (MNA)                                                    | No                                                                                                                                                                               | No                                                                                  |
| Clough-Gorr, 2010 [73]                                                   | Geriatric assessment      | No                      | No                                  | Yes, CCI                          | No                                                         | Yes, Depression (5-items MOS)        | No                                                                                   | Age, sex, social support (8-items, MOS), functional limitations (10-items, MOS), self-rated health prior to cancer diagnosis, self-reported treatment tolerance, financial needs | Yes, number of geriatric assessment deficits, dichotomized as $\leq 2$ or $\geq 3$  |
| Extermann, 2004 [74]                                                     | CGA                       | Yes, Katz Index         | Yes, Lawton Scale                   | Yes, CCI and CIRS-G               | Yes, MMSE                                                  | Yes, GDS (15 items)                  | Yes, nutritional assessment (MNA)                                                    | QOL (FACT-B), PS (ECOG)                                                                                                                                                          | Yes, each assessments categorized as no risk, low risk, moderate risk, or high risk |
| Freyer, 2004 [28]                                                        | CGA                       | Yes, tool not specified | Yes, tool not specified             | Yes, tool not specified           | Yes, MMSE                                                  | Yes, Depression (tool not specified) | Yes, nutritional assessment (BMI, protidemia, albuminemia, total cholesterol levels) | Living arrangements (tool not specified), medications (tool not specified)                                                                                                       | No                                                                                  |
| Freyer, 2005 [29]                                                        | MGA                       | Yes, tool               | No                                  | Yes, tool not                     | Yes, MMSE                                                  | Yes, Anxiety                         | Yes, nutritional                                                                     | Medications (number at baseline),                                                                                                                                                | No                                                                                  |

| First author, year [reference] | Name of assessment(s)     | ADL                               | IADL                                | Comorbidity                       | Cognitive functioning | Mood                                        | Nutrition                                                                                                                                                     | Other instruments and/or domains                                                            | Summary score                                                         |
|--------------------------------|---------------------------|-----------------------------------|-------------------------------------|-----------------------------------|-----------------------|---------------------------------------------|---------------------------------------------------------------------------------------------------------------------------------------------------------------|---------------------------------------------------------------------------------------------|-----------------------------------------------------------------------|
|                                |                           | not specified                     |                                     | specified                         |                       | (HADS), Depression (HADS),                  | assessment (PINI)                                                                                                                                             | gait speed (TUG)                                                                            |                                                                       |
| Fukuse, 2005 [100]             | CGA                       | Yes, Barthel Index                | No                                  | Yes, tool not specified           | Yes, MMSE             | No                                          | Yes, nutritional assessment (height, weight, triceps skinfold, mid-arm muscle circumference, levels of serum albumin, transferrin, and cholinesterase levels) | Age, sex, PS (ECOG), lymphocyte count, hemoglobin, sodium, potassium, BUN, serum creatinine | No                                                                    |
| Hurria, 2006 [30]              | Geriatric assessment      | Yes, Katz Index                   | Yes, Lawton Scale                   | Yes, CCI (age-adjusted)           | No                    | Yes, GDS (15 items)                         | No                                                                                                                                                            | PS (Karnofsky)                                                                              | No                                                                    |
| Hurria, 2006 [31]              | Geriatric assessment      | Yes, Katz Index                   | Yes, Lawton-Brody Scale             | Yes, CCI                          | Yes, MMSE             | Yes, GDS (15 items)                         | No                                                                                                                                                            | QOL (FACT-B), PS (Karnofsky)                                                                | No                                                                    |
| Hurria, 2006 [32]              | Geriatric assessment      | Yes, MOS physical health subscale | Yes, OARS and Reuben exercise scale | Yes, OARS physical health section | No                    | Yes, GDS (15 items)                         | Yes, nutritional assessment (BMI)                                                                                                                             | Functional limitations (FACT-B), QOL(FACT-B)                                                | No                                                                    |
| Kothari, 2011 [33]             | CGA, geriatric assessment | Yes, tool not specified           | Yes, tool not specified             | No                                | No                    | Yes, GDS (15 items)                         | Yes, nutritional assessment (Nutrition Screening Initiative Nutritional Health Checklist)                                                                     | Age, sex                                                                                    | No                                                                    |
| Kristjansson, 2010 [75]        | CGA                       | Yes, Barthel Index                | Yes, NEADL                          | Yes, CIRS                         | Yes, MMSE             | Yes, Depression (30-items GDS)              | Yes, nutritional assessment (MNA)                                                                                                                             | Medications (number), PS (ECOG)                                                             | Yes, modified Balducci classification of fit or intermediate vs frail |
| Kristjansson, 2010 [71]        | CGA                       | Yes, Barthel Index                | Yes, NEADL                          | Yes, CIRS                         | Yes, MMSE             | Yes, Depression (30-items GDS)              | Yes, nutritional assessment (MNA)                                                                                                                             | Medications (number), PS (ECOG),                                                            | No                                                                    |
| Marenco, 2008 [34]             | MGA                       | Yes, Katz Index                   | Yes, Lawton Scale                   | Yes, CIRS                         | Yes, SPMSQ            | No                                          | Yes, nutritional assessment (BMI)                                                                                                                             | PS (Karnofsky)                                                                              | Yes, unclear how categorized                                          |
| Marinello, 2009 [35]           | CGA                       | Yes, Katz Index                   | Yes, Lawton-Brody Scale             | Yes, CIRS                         | Yes, SPMSQ            | No                                          | Yes, nutritional assessment (BMI)                                                                                                                             | PS (Karnofsky)                                                                              | No                                                                    |
| Massa, 2006 [36]               | CGA                       | Yes, tool not specified           | Yes, tool not specified             | No                                | Yes, MMSE             | Yes, GDS (not clear which version was used) | Yes, nutritional assessment (MNA)                                                                                                                             | No                                                                                          | No                                                                    |
| Massa, 2008 [76]               | MGA                       | Yes, Katz Index                   | Yes, Lawton-Brody                   | Yes, CIRS-G                       | Yes, MMSE             | Yes, GDS (30 items)                         | Yes, nutritional assessment                                                                                                                                   | Geriatric syndromes: dementia, depression, delirium, falls,                                 | Yes, patients were classified as fit,                                 |

| First author, year [reference]                                        | Name of assessment(s)                                          | ADL                                           | IADL                                          | Comorbidity                 | Cognitive functioning   | Mood                                      | Nutrition                                                                          | Other instruments and/or domains                                                                                                                                                      | Summary score                                                                                                                                                                                                                   |
|-----------------------------------------------------------------------|----------------------------------------------------------------|-----------------------------------------------|-----------------------------------------------|-----------------------------|-------------------------|-------------------------------------------|------------------------------------------------------------------------------------|---------------------------------------------------------------------------------------------------------------------------------------------------------------------------------------|---------------------------------------------------------------------------------------------------------------------------------------------------------------------------------------------------------------------------------|
|                                                                       |                                                                |                                               | Scale                                         |                             |                         |                                           | (MNA)                                                                              | osteoporosis, neglect and abuse, and failure to thrive                                                                                                                                | intermediate, or frail, but how this was done NR                                                                                                                                                                                |
| Presant, 2005 [37]                                                    | Geriatric Oncology Module                                      | Yes, 7-item tool previously developed by team | Yes, 8-item tool previously developed by team | No                          | No                      | No                                        | No                                                                                 | QOL 5-point scale (tool not specified), fatigue (5-point scale, tool not specified), pain (5-point scale, tool not specified)                                                         | No                                                                                                                                                                                                                              |
| Puts, 2010 [94]#<br>Puts, 2011 [95]#                                  | Frailty assessment using frailty markers                       | Yes, Katz Index                               | Yes, OARS items                               | Yes, FCI                    | Yes, MMSE and MOCA      | Yes, Anxiety (HADS), Depression (HADS)    | Yes, weight and weight loss (BMI)                                                  | Functional limitations ( items developed by Nagi), gait speed (4 m), fall assessment, grip strength, fatigue (EORTC), PS (ECOG), physical inactivity (CSHA Risk Factor Questionnaire) | Yes, count of frailty markers                                                                                                                                                                                                   |
| Rao, 2005 [38]                                                        | Geriatric evaluation                                           | Yes, Katz Index                               | Yes, Fillenbaum IADL                          | Yes, CCI                    | Yes, tool not specified | No                                        | Yes, nutritional assessment (tool not specified)                                   | Social support (tool not specified), fall assessment (PPT), SF-36, complete medical history and physical examination, screening for geriatric syndromes                               | No                                                                                                                                                                                                                              |
| Tredan, 2007 [39]                                                     | CGA                                                            | Yes, tool not specified                       | Yes, Lawton-Brody Scale                       | Yes, medical history        | Yes, MMSE               | Yes, Depression (HADS) and anxiety (HADS) | Yes, nutritional assessment (BMI, total protein, albumin, pre-albumin, CRP levels) | Medications (number), PS (ECOG), blood chemistry, hematology                                                                                                                          | No                                                                                                                                                                                                                              |
| Tucci, 2009 [40]                                                      | CGA                                                            | Yes, Katz Index                               | No                                            | Yes, CIRS-G                 | No                      | No                                        | No                                                                                 | Age, geriatric syndromes                                                                                                                                                              | Yes Balducci classification of frail or vulnerable vs fit                                                                                                                                                                       |
| Wedding, 2007 [41]**                                                  | Functional status                                              | Yes, Barthel Index                            | Yes, Lawton-Brody Scale                       | Yes, CIRS-G                 | No                      | No                                        | No                                                                                 | PS (WHO)                                                                                                                                                                              | No                                                                                                                                                                                                                              |
| <b>Geriatric assessment studied in a cross-sectional study design</b> |                                                                |                                               |                                               |                             |                         |                                           |                                                                                    |                                                                                                                                                                                       |                                                                                                                                                                                                                                 |
| Bearz, 2007 [42]                                                      | Frailty assessment using frailty markers, geriatric assessment | Yes, tool not specified                       | No                                            | Yes, CIRS-G                 | No                      | Yes, depression, not clear how assessed   | No                                                                                 | Geriatric comorbidities: dementia, delirium, incontinence, osteoporosis, anemia, neglect and abuse, failure to thrive, more than three tumbles in the last month                      | Yes, frail defined as patients aged $\geq 80$ y, or those $\geq 70$ y with $\geq 3$ comorbidities or 1 grade 4 comorbidity, or patients needing help with ADL or those who had one geriatric syndrome, how unfit was defined NR |
| Bylow, 2011[43]                                                       | Frailty assessment using frailty markers                       | No                                            | No                                            | Yes, OARS Comorbidity Scale | No                      | No                                        | Yes, weight and weight loss (self-reported unintentional weight loss)              | Self-reported number of falls, gait speed (SPPB, 15-ft timed walk), grip strength, fatigue (2-items CES-D)                                                                            | Yes, Fried Frailty score and modified Fried Frailty score                                                                                                                                                                       |
| Di Mauro, 2000 [44]                                                   | MGA                                                            | Yes, Katz Index                               | Yes, Lawton-Brody Scale                       | Yes, SIC                    | Yes, MMSE               | Yes, GDS (4-items)                        | No                                                                                 | PS (ECOG)                                                                                                                                                                             | No                                                                                                                                                                                                                              |
| Dujon 2006 [45]                                                       | Geriatric assessment                                           | Yes, Katz Index                               | Yes, Lawton-Brody Scale                       | Yes, CCI                    | Yes, MMSE               | No                                        | Yes, weight and weight loss (BMI,                                                  | Fall assessment (TUG), gait speed, PS (ECOG, Karnofsky)                                                                                                                               | No                                                                                                                                                                                                                              |

| First author, year [reference]             | Name of assessment(s)                                 | ADL                               | IADL                                | Comorbidity                                | Cognitive functioning                      | Mood                                   | Nutrition                                                                                          | Other instruments and/or domains                                                                                                                                                                                                                                                            | Summary score                                                                                                                                                                             |
|--------------------------------------------|-------------------------------------------------------|-----------------------------------|-------------------------------------|--------------------------------------------|--------------------------------------------|----------------------------------------|----------------------------------------------------------------------------------------------------|---------------------------------------------------------------------------------------------------------------------------------------------------------------------------------------------------------------------------------------------------------------------------------------------|-------------------------------------------------------------------------------------------------------------------------------------------------------------------------------------------|
|                                            |                                                       |                                   |                                     |                                            |                                            |                                        | MNA, PINI),                                                                                        |                                                                                                                                                                                                                                                                                             |                                                                                                                                                                                           |
| Extermann, 1998 [46]                       | CGA                                                   | Yes, Katz Index                   | Yes, Lawton-Brody Scale             | Yes, CCI and CIRS-G                        | No                                         | No                                     | No                                                                                                 | PS (ECOG)                                                                                                                                                                                                                                                                                   | No                                                                                                                                                                                        |
| Girones, 2010 [47]                         | CGA                                                   | Yes, Katz Index                   | Yes, Lawton Scale                   | Yes, CCI                                   | Yes, previous dementia diagnosis           | Yes, GDS (5-items)                     | Yes, nutritional assessment (BMI)                                                                  | Age, medications (number), PS (ECOG), geriatric syndromes: dementia, delirium, depression, falls, neglect and abuse, spontaneous bone fractures                                                                                                                                             | Yes, Balducci classification of frail or vulnerable vs fit                                                                                                                                |
| Girre, 2008 [48]                           | Geriatric assessment, geriatric oncology consultation | Yes, Katz Index                   | Yes, Lawton-Brody Scale             | Yes, number of comorbidities, chart review | No                                         | Yes, GDS (4-items)                     | Yes, weight and weight loss (self-reported weight loss in past 3 mo), nutritional assessment (BMI) | Age, sex, living arrangements (tool not specified), social support (tool not specified), medications (number), fall assessment (number of falls in past 2 y), PS (ECOG); serum albumin, CRP, hemoglobin, and creatinine; cancer treatment plan proposed and modifications to treatment plan | No                                                                                                                                                                                        |
| Hurria, 2005 [88]                          | Cancer-specific geriatric assessment                  | Yes, MOS physical health subscale | Yes, OARS and Reuben exercise scale | No                                         | Yes, BOMC                                  | Yes, Anxiety (HADS), Depression (HADS) | Yes, nutritional assessment (BMI, self-reported weight loss)                                       | Social support (MOS), fall assessment (TUG, number of self-reported falls), gait speed (TUG), PS (Karnofsky)                                                                                                                                                                                | No                                                                                                                                                                                        |
| Hurria, 2007 [89]††<br>Hurria, 2009 [90]†† | Geriatric assessment                                  | Yes, MOS physical health subscale | Yes, OARS and Reuben exercise scale | Yes, OARS physical health section          | No                                         | Yes, Distress thermometer              | Yes, weight and weight loss (BMI and percent unintentional weight loss in past 6 mo)               | Social support (MOS), , fall assessment (number of falls in past 6 mo), PS (Karnofsky)                                                                                                                                                                                                      | No                                                                                                                                                                                        |
| Ingram, 2002 [85]                          | CGA                                                   | Yes, EORTC QLQ-C30                | Yes, OARS and Reuben exercise scale | Yes, OARS Co-morbidity Scale               | No                                         | Yes, Anxiety (HADS), Depression (HADS) | No                                                                                                 | Social support (MOS), medications (number), QOL (EORTC QLQ-C30), fatigue (EORTC QLQ C-30), pain (VAS), symptom assessment (EORTC QLQ-C30), financial well-being, spiritual well-being (SOBI)                                                                                                | No                                                                                                                                                                                        |
| Kellen, 2010 [49]                          | CGA, aCGA                                             | Yes, Barthel Index                | Yes, Lawton Scale                   | No                                         | Yes, full CGA 30 items, aCGA 4 items, MMSE | Yes, GDS (15 items)                    | No                                                                                                 | VES-13, GFI                                                                                                                                                                                                                                                                                 | Yes, risk of vulnerability was defined as having a MMSE<24, ADL or IADL impairment in ≥2 domains for full CGA, andfor pre-screening tools examined scores of ≥ 3 for VES-13 or ≥4 for GFI |
| Kim, 2011 [50]                             | CGA                                                   | Yes Mahoney and Barthel index     | Yes, Lawton-Brody Scale             | Yes, CCI                                   | Yes, MMSE                                  | Yes Depression (SGDS)                  | Yes, weight and weight loss (BMI), nutritional assessment (MNA)                                    | Social support (tool not specified), medications (tool not specified), fall assessment (TUG, falls in past 6 mo), QOL (EORTC QLQ C30), PS (ECOG), geriatric syndromes                                                                                                                       | Yes Balducci classification of frail or vulnerable vs fit                                                                                                                                 |
| Luciani, 2010 [51]                         | CGA                                                   | Yes, tool not specified           | Yes, tool not specified             | Yes, CIRS-G                                | Yes, MMSE                                  | No                                     | Yes, nutritional assessment (MNA-SF)                                                               | Age, living arrangements (living situation, safety), social support (caregiver availability), medications (number, type), PS (ECOG)                                                                                                                                                         | Yes, those with VES-13 score ≥ 3 were considered vulnerable                                                                                                                               |

| First author, year [reference] | Name of assessment(s)                                              | ADL                | IADL                    | Comorbidity             | Cognitive functioning   | Mood                                            | Nutrition                                             | Other instruments and/or domains                                                                                                                                                                                    | Summary score                                                                                             |
|--------------------------------|--------------------------------------------------------------------|--------------------|-------------------------|-------------------------|-------------------------|-------------------------------------------------|-------------------------------------------------------|---------------------------------------------------------------------------------------------------------------------------------------------------------------------------------------------------------------------|-----------------------------------------------------------------------------------------------------------|
| Lynch, 2007 [52]               | Geriatric evaluation                                               | No                 | Yes, tool not specified | No                      | Yes, tool not specified | Depression (2 questions, not further specified) | No                                                    | Age, living arrangements (living alone), medications (current), fall assessment (TUG), gait speed (TUG), uncontrolled geriatric syndromes: incontinence, falls, dementia, need for referrals to other disciplines   | No                                                                                                        |
| Mantovani, 2004 [53]           | CGA                                                                | Yes, Katz Index    | Yes, Lawton-Brody Scale | No                      | Yes, MMSE               | Yes, Depression (BDI-I)                         | Yes, nutritional assessment (MNA)                     | PS (ECOG)                                                                                                                                                                                                           | No                                                                                                        |
| Mohile, 2007 [78]§             | Frailty assessment using frailty markers, vulnerability assessment | Yes, Katz Index    | Yes, Lawton-Brody Scale | No                      | No                      | No                                              | No                                                    | Social support (MOS), medications (number), fall assessment (self-reported history of falls), gait speed (SPPB), VES-13                                                                                             | Yes, VES-13 score $\geq 3$ or deficits on $\geq 2$ tests of the CGA                                       |
| Mohile, 2009 [54]              | CGA                                                                | Yes, Katz Index    | Yes, Lawton Scale       | Yes, CCI                | Yes, SPMSQ              | No                                              | No                                                    | Low self-rated health, VES-13, Balducci Frailty Score, Self-reported geriatric syndromes: memory, osteoporosis, depression, falls, incontinence                                                                     | Yes, Balducci classification of frail or vulnerable vs fit                                                |
| Molina-Garrido, 2011 [55]      | CGA, frailty assessment using frailty markers                      | Yes, Barthel Index | Yes, Lawton-Brody Scale | Yes, CCI                | Yes, Pfeiffer Test      | No                                              | Yes, nutritional assessment (NSI)                     | Age, living arrangements (tool not specified), social support (Gijon Social Scale modified), medications (tool not specified), PS (ECOG), VES-13, Barber Questionnaire                                              | Yes, VES-13 score $\geq 3$ or deficits on $\geq 2$ tests of the CGA or score $>0$ on Barber Questionnaire |
| Molina-Garrido, 2011 [56]      | CGA                                                                | Yes, Barthel Index | Yes, Lawton-Brody Scale | Yes, CCI                | No                      | No                                              | Yes, nutritional assessment (Malnutrition Risk Scale) | Age, social support (Gijon Social Scale modified), medications (tool not specified), PS (ECOG), geriatric syndromes, Barber Questionnaire                                                                           | No                                                                                                        |
| Monfardini, 1996 [57]          | Multidimensional Assessment Protocol for Cancer in the Elderly     | Yes, Katz Index    | Yes, Lawton-Brody Scale | Yes, tool not specified | Yes, MMSE               | Yes, GDS (30 items)                             | No                                                    | Age, sex, social support (tool not specified), fall assessment (PPT, FICSIT balance scale), QOL (SIP), symptom assessment (tool not specified), use of services, household composition, characteristics of neoplasm | No                                                                                                        |
| Overcash, 2007 [58]            | CGA                                                                | Yes, Katz Index    | Yes, Lawton-Brody Scale | No                      | Yes, MMSE               | Yes, GDS (15 items)                             | No                                                    | Fall assessment (AGS guidelines)                                                                                                                                                                                    | No                                                                                                        |
| Overcash, 2008 [77]            | CGA                                                                | Yes, Katz Index    | Yes, Lawton-Brody Scale | Yes, tool not specified | Yes, MMSE               | Yes, GDS (15 items)                             | No                                                    | Age, sex, fall assessment (AGS guidelines), diagnosis, medical history                                                                                                                                              | No                                                                                                        |
| Pignata, 2008 [59]             | Geriatric assessment, geriatric evaluation                         | Yes, Katz Index    | Yes, tool not specified | Yes, tool not specified | No                      | No                                              | No                                                    | No                                                                                                                                                                                                                  | No                                                                                                        |
| Pope, 2006 [60]†               | CGA                                                                | Yes, Katz Index    | Yes, Lawton-Brody Scale | Yes, SIC                | Yes, MMSE               | Yes, GDS (15 items)                             | No                                                    | Fatigue (Brief Fatigue inventory), PS (ECOG), ASA Scale                                                                                                                                                             | No                                                                                                        |
| Repetto, 2002 [61]             | CGA                                                                | Yes, Katz Index    | Yes, Lawton-Brody Scale | Yes, Modified SIC       | Yes, MMSE               | Yes, GDS (30 items)                             | No                                                    | Age, sex, fall assessment (FISCIT balance scale), gait speed (PPT), PS (ECOG), Monfardini Assessment Instrument                                                                                                     | No                                                                                                        |
| Retornaz, 2008                 | Frailty                                                            | Yes, Katz          | Yes, OARS               | Yes,                    | Yes, MMSE               | Yes, Anxiety                                    | Yes, weight                                           | Age, sex, living arrangements (tool                                                                                                                                                                                 | Yes, four hierarchical                                                                                    |



| First author, year [reference]                                                 | Name of assessment(s)            | ADL                | IADL                                                      | Comorbidity          | Cognitive functioning            | Mood                                       | Nutrition                                                                                               | Other instruments and/or domains                                                                                                                                                                                                                                     | Summary score                                                                                                     |
|--------------------------------------------------------------------------------|----------------------------------|--------------------|-----------------------------------------------------------|----------------------|----------------------------------|--------------------------------------------|---------------------------------------------------------------------------------------------------------|----------------------------------------------------------------------------------------------------------------------------------------------------------------------------------------------------------------------------------------------------------------------|-------------------------------------------------------------------------------------------------------------------|
| [93]                                                                           | assessment using frailty markers | Index              |                                                           | CIRS-G               | and MOCA                         | (HADS), Depression (HADS)                  | and weight loss (self-reported), nutritional assessment (BMI and self-reported decrease in food intake) | not specified), social support (tool not specified), fall assessment (TUG, self-reported history of falls), gait speed (TUG), grip strength, fatigue (Visual Analogue Scale)                                                                                         | groups based on functional status                                                                                 |
| Roche, 1997 [62]                                                               | Geriatric assessment             | Yes, Katz Index    | Yes, Lawton-Brody Scale                                   | No                   | Yes, MMSE                        | Yes, GDS (30 items)                        | No                                                                                                      | Functional limitations (tool not specified), PS (Karnofsky)                                                                                                                                                                                                          | No                                                                                                                |
| Serraino, 2001 [63]                                                            | CGA, functional status           | Yes, Katz Index    | Yes, Lawton-Brody Scale                                   | Yes, medical history | No                               | Yes, GDS (not reported which version used) | Yes, nutritional assessment (tool not specified)                                                        | Age, sex, social support (tool not specified), medications (number), fall assessment, PS (ECOG)                                                                                                                                                                      | No                                                                                                                |
| Siegel, 2006 [64]                                                              | Geriatric functional assessment  | No                 | No                                                        | No                   | Yes, MMSE                        | Yes, GDS (30 items)                        | No                                                                                                      | Gait speed (Tinetti Gait and Balance test, TUG), grip strength, PS (ECOG)                                                                                                                                                                                            | No                                                                                                                |
| Stauder, 2010 [65]                                                             | Geriatric assessment             | Yes, Barthel Index | Yes, Lawton-Brody Scale                                   | Yes, CCI and CIRS-G  | Yes, MMSE                        | Yes, GDS (30 items)                        | Yes, nutritional assessment (MNA)                                                                       | Social support (F-sozU), gait speed (7-items PPT, TUG), QOL (FACT-G), PS (Karnofsky, WHO), VES-13                                                                                                                                                                    | No                                                                                                                |
| To, 2010 [66]                                                                  | Geriatric assessment             | Yes OARS           | Yes, Fillenbaum IADL and SF-36 physical functioning scale | Yes, CCI             | Yes, self-reported forgetfulness | Yes, Depression (tool unspecified)         | Yes, weight and weight loss (unintentional weight loss in past 6 mo)                                    | Social support (5 items MOS), Medications (number), Pain 11-point numerical scale, not fall assessment (number of falls in past 6 mo), Distress, 11-point numerical scale, PS (Karnofsky), vision, hearing, exhaustion, current support services, caregiver concerns | Yes, 4-5 concerns in functional status was considered frail, 1-3 concerns was vulnerable, and no concerns was fit |
| Venturino, 2000 [67]                                                           | CGA                              | Yes, Katz Index    | Yes, tool not specified                                   | Yes, SIC             | Yes, MMSE                        | Yes, GDS (not clear which version used)    | No                                                                                                      | Age, PS (ECOG)                                                                                                                                                                                                                                                       | No                                                                                                                |
| Wedding, 2007 [68]**                                                           | Functional status                | No                 | Yes, Lawton-Brody Scale                                   | Yes, CIRS-G          | No                               | No                                         | No                                                                                                      | QOL (EORTC QLQ C30), PS (Karnofsky)                                                                                                                                                                                                                                  | No                                                                                                                |
| Wedding, 2007 [99]                                                             | CGA                              | Yes, Barthel Index | Yes, Lawton-Brody Scale                                   | Yes, CCI             | Yes, MMSE                        | No                                         | Yes, nutritional assessment (MNA)                                                                       | Age, fall assessment (Tinetti test), number of deficits                                                                                                                                                                                                              | Yes Balducci classification of frail or vulnerable vs fit and judgment of the physician in these categories       |
| <b>Geriatric assessment studied in retrospective studies and chart reviews</b> |                                  |                    |                                                           |                      |                                  |                                            |                                                                                                         |                                                                                                                                                                                                                                                                      |                                                                                                                   |
| Barthelemy, 2011 [98]                                                          | CGA                              | Yes, Katz Index    | Yes, Lawton-Brody Scale                                   | Yes, CIRS-G          | Yes, MMSE                        | Yes, GDS (15 items)                        | No                                                                                                      | Age, sex, living arrangements (tool not specified), medications (tool not specified), fall assessment (falls in last year), PS (ECOG), geriatric syndromes                                                                                                           | Yes, Balducci classification of frail or vulnerable vs fit                                                        |
| Basso, 2008 [79]                                                               | MGA                              | Yes, Katz Index    | Yes, Lawton Scale                                         | Yes, CIRS-G          | Yes, MMSE                        | Yes, GDS (30 items)                        | Yes, nutritional assessment                                                                             | Creatinine clearance                                                                                                                                                                                                                                                 | Yes, Balducci classification of frail or                                                                          |

| First author, year [reference]                     | Name of assessment(s)                  | ADL                                         | IADL                                        | Comorbidity                                            | Cognitive functioning                                                                  | Mood                                        | Nutrition                                                                                      | Other instruments and/or domains                                                                                                                                                                     | Summary score                                                                                                                                                                                                                                                                                                       |
|----------------------------------------------------|----------------------------------------|---------------------------------------------|---------------------------------------------|--------------------------------------------------------|----------------------------------------------------------------------------------------|---------------------------------------------|------------------------------------------------------------------------------------------------|------------------------------------------------------------------------------------------------------------------------------------------------------------------------------------------------------|---------------------------------------------------------------------------------------------------------------------------------------------------------------------------------------------------------------------------------------------------------------------------------------------------------------------|
|                                                    |                                        |                                             |                                             |                                                        |                                                                                        |                                             | (BMI)                                                                                          |                                                                                                                                                                                                      | vulnerable vs fit                                                                                                                                                                                                                                                                                                   |
| Cudennec, 2007 [72]                                | CGA                                    | Yes, Katz Index                             | Yes, Lawton-Brody Scale                     | Yes, tool unspecified                                  | Yes, MMSE                                                                              | Yes, GDS (4-items)                          | No                                                                                             | Living arrangements (type of residence), social support (assistance in residence), medications (tool not specified), fall assessment (TUG), gait speed (TUG), sensory capacities                     | Yes, group 1 fit defined as functionally independent, no comorbidities; group 3 frail defined as severe comorbidities and/or not independent in ADL and ambulatory and group 2 in-between (ambulatory but with comorbidities and ADL dependence).                                                                   |
| Cudennec, 2010 [84]                                | Simplified geriatric evaluation        | No                                          | Yes, Lawton-Brody Scale                     | Yes, number of comorbidities, tool not specified       | Yes, MMSE and clock-drawing test                                                       | Yes, GDS (4-items)                          | Yes, nutritional assessment (MNA)                                                              | Living arrangements (tool not specified), social support (tool not specified), medications (number, drug interactions, adverse effects, patient compliance), fall assessment (TUG), gait speed (TUG) | Yes, Balducci classification of frail (group 3) or vulnerable (group 2) vs fit (group 1). The vulnerable group (group 2) was split into 2 groups named 2+ and 2-, 2- had non-stabilized comorbidities and 2+ had stabilized comorbidities (stabilized and non-stabilized comorbidities not defined by the authors). |
| Fratino, 1999 [69]                                 | CGA                                    | Yes, Katz Index                             | Yes, Lawton Scale                           | No                                                     | Yes, MMSE                                                                              | Yes GDS (15 items)                          | No                                                                                             | PS (tool not specified)                                                                                                                                                                              | No                                                                                                                                                                                                                                                                                                                  |
| Flood, 2006 [92]                                   | Functional status, geriatric syndromes | Yes, Katz Index                             | Yes, Lawton Scale                           | No                                                     | Yes, Short BOMC and the clock-drawing test, dementia and delirium based on chart notes | Yes GDS (30 items)                          | Yes, weight and weight loss (weight loss or poor nutrition or malnutrition noted in the chart) | Age, sex, medications (number, class), fall assessment (tool not specified), Braden Scale for pressure ulcers, use of restraints                                                                     | No                                                                                                                                                                                                                                                                                                                  |
| Garman, 2004 [86]                                  | CGA                                    | Functional status was abstracted from chart | functional status was abstracted from chart | Yes, list of co-morbid conditions, chart review        | Yes, MMSE or chart notes                                                               | No                                          | No                                                                                             | Age, sex, social support (tool not specified), PS (Karnofsky), goals of admission, goals of care, goals met or not                                                                                   | No                                                                                                                                                                                                                                                                                                                  |
| Koroukian, 2006 [91]##                             | CGA                                    | Yes, OASIS                                  | Yes, OASIS                                  | Yes, List of co-morbid conditions developed by NIA/NCI | Yes, dementia and delirium, OASIS                                                      | Yes, Depression (depressive feelings OASIS) | No                                                                                             | Geriatric syndromes: dementia, delirium, depression, osteoporosis, incontinence, failure to thrive, and falls                                                                                        | No                                                                                                                                                                                                                                                                                                                  |
| Koroukian, 2010 [80] ##                            | NR                                     | Yes, OASIS                                  | Yes, OASIS                                  | Yes, List of co-morbid conditions developed by NIA/NCI | Yes, dementia and delirium OASIS                                                       | Yes, Depression (depressive feelings OASIS) | No                                                                                             | Geriatric syndromes: dementia, delirium, depression, osteoporosis, incontinence, and falls                                                                                                           | No                                                                                                                                                                                                                                                                                                                  |
| Overcash, 2005 [81]\$\$<br>Overcash, 2006 [83]\$\$ | aCGA                                   | Yes, tool unclear                           | Yes, Lawton Scale                           | No                                                     | MMSE items attention and calculation, reading, writing,                                | Yes, GDS (4-items)                          | No                                                                                             | No                                                                                                                                                                                                   | No                                                                                                                                                                                                                                                                                                                  |

| First author, year [reference] | Name of assessment(s)               | ADL                     | IADL                                        | Comorbidity                 | Cognitive functioning | Mood                               | Nutrition                                                                                                                     | Other instruments and/or domains                                                                                                                          | Summary score                                             |
|--------------------------------|-------------------------------------|-------------------------|---------------------------------------------|-----------------------------|-----------------------|------------------------------------|-------------------------------------------------------------------------------------------------------------------------------|-----------------------------------------------------------------------------------------------------------------------------------------------------------|-----------------------------------------------------------|
|                                |                                     |                         |                                             |                             | copying               |                                    |                                                                                                                               |                                                                                                                                                           |                                                           |
| Retornaz, 2008 [82]            | Geriatric assessment                | Yes, Katz Index         | Yes, 4-items Barberger-Gateau questionnaire | Yes, ICD-10, French version | Yes, MMSE             | Yes, GDS (4-items)                 | Yes, nutritional assessment (MNA-SF)                                                                                          | Medications (number), fall assessment (self-reported history of falls), gait speed (one-leg balance test), trouble hearing or seeing                      | No                                                        |
| Rollot-Trad, 2008 [97]         | NR                                  | Yes, tool not specified | Yes, tool not specified                     | Yes, CCI                    | Yes, MMSE             | Yes, Depression (tool unspecified) | Yes, weight and weight loss (weight loss of ≥3 kg), nutritional assessment (albumin, pre-albumin, folate, vitamin B12 levels) | Age, sex, living arrangements (tool not specified), PS (tool not specified), home help from professionals or family members                               | No                                                        |
| Sorio, 2006 [70]               | Geriatric risk assessment           | Yes, tool not specified | Yes, tool not specified                     | No                          | No                    | No                                 | No                                                                                                                            | PS (ECOG), concomitant treatment                                                                                                                          | Yes, geriatric risk score                                 |
| Terret, 2004 [87]              | Minimal CGA                         | Yes, Katz Index         | Yes, Lawton Scale                           | Yes, CIRS-G                 | Yes, MMSE             | Yes, GDS (30 items)                | Yes, nutritional assessment (MNA)                                                                                             | Grip strength Performance-Oriented Assessment of Mobility, PS (Karnofsky), hemoglobin, WBC, differential count, creatinine clearance, serum albumin level | No                                                        |
| Yonnet, 2008 [96]              | Évaluation Gériatrique Standardisée | Yes, Katz Index         | No                                          | Yes, CCI                    | No                    | No                                 | Yes, weight and weight loss (BMI)                                                                                             | Age, fall assessment, PS (ECOG), creatinine clearance                                                                                                     | Yes Balducci classification of frail or vulnerable vs fit |

\*aCGA = abbreviated comprehensive geriatric assessment; ADL = activities of daily living; AGS = American Geriatric Society; ASA= American Society of Anesthesiologists; BMI = body mass index; BOMC = Blessed Orientation-Memory-Concentration Test; BUN = blood urea nitrogen; CES-D=Center for Epidemiologic Studies Depression Scale; CGA = comprehensive geriatric assessment; CCI = Charlson comorbidity index; CSHA= Canadian Study on Health and Aging; CIRS-G = Cumulative Illness Rating Scale-Geriatric; CRP= C-reactive protein; DLCL = diffuse large cell lymphoma; ECOG = Eastern Collaborative Group Oncology; EORTC QLQ-C30= European FACT-G= Functional Assessment Cancer Treatment-General; FACT-B = Functional assessment Cancer treatment-Breast; FCI= Functional Comorbidity Index; FICIT study= Frailty and Injuries: Cooperative Studies of Intervention Techniques; F-SozU= Questionnaire for the assessment of Social Support GDS = Geriatric Depression Scale; GFI = Groningen Frailty Indicator; HADS = Hospital Anxiety and Depression Scale; IADL = instrumental activities of daily living; ICD = International Classification of Diseases; IQCODE = Informant Questionnaire on Cognitive Decline in the Elderly; MGA = Multidimensional Geriatric Assessment; MMSE = Mini Mental State Examination; MNA = Mini Nutritional Assessment; MNA-SF Mini Nutritional Assessment Short Form; MoCa= Montreal Cognitive Assessment Tool; MOS=Medical Outcome Study Health Survey; NIA= National Institute of Aging; NCI = National Cancer Institute; NEADL= Nottingham Extended Activities of Daily Living Scale; NSI = Nutritional Risk Screening; NR = not reported; OARS = Older Americans Resources and Services Survey; OASIS = Outcome Assessment Information Set database; PACE = Pre-operative Assessment of Cancer in the Elderly; PINI = Prognostic Inflammatory and Nutritional Index; PPT= physical performance test; PS = performance status; QOL= quality of life; SF-36= 36-Item Short Form Health Survey; SIP= Sickness Impact Profile; SOBI= Systems of Belief Inventory; SPMSQ = Short Portable Mental Screening Questionnaire; SPPB = Short Physical Performance Battery; TUG=Timed Up and Go test; SIC = Satariano Comorbidity Index; VAS = Visual Analogue Scale; VES-13 = Vulnerable Elder Survey 13 items; WBC = white blood cell; WHO = World Health Organization.

†Articles reporting on the same study.

‡Articles reporting on the same study.

§Articles reporting on the same study.

||Articles reporting on the same study.

¶Articles reporting on the same study.

#Articles reporting on the same study.

\*\*Articles reporting on the same study.

††Articles reporting on the same study.

‡‡Articles reporting on the same study.

§§Articles reporting on the same study.

**Supplementary Table 4.** Predictive validity of geriatric assessment for use-of-care outcome and other outcomes studied\*

| First author, year [reference]                                                  | Type of statistical analysis                                                     | Was multivariable analysis conducted and were adjustments appropriate?                                                                                                                                                            | Use of care                                                                                                                                                                                                                         | Other outcomes studied                                                                                                                                                                                                                                                        |
|---------------------------------------------------------------------------------|----------------------------------------------------------------------------------|-----------------------------------------------------------------------------------------------------------------------------------------------------------------------------------------------------------------------------------|-------------------------------------------------------------------------------------------------------------------------------------------------------------------------------------------------------------------------------------|-------------------------------------------------------------------------------------------------------------------------------------------------------------------------------------------------------------------------------------------------------------------------------|
| <b>Geriatric assessment studied in a prospective observational study design</b> |                                                                                  |                                                                                                                                                                                                                                   |                                                                                                                                                                                                                                     |                                                                                                                                                                                                                                                                               |
| Aaldriks, 2011 [18]                                                             | Paired sample <i>t</i> test to compare changes in geriatric assessment over time | NA                                                                                                                                                                                                                                | NA                                                                                                                                                                                                                                  | Mean MMSE score worsened statistically significantly over time (mean change score = -0.86).                                                                                                                                                                                   |
| Arnoldi, 2007 [20]                                                              | NR                                                                               | Unclear                                                                                                                                                                                                                           | NA                                                                                                                                                                                                                                  | 72% of non-frail patients were treated, compared with 19% of borderline and 9% of frail patients.                                                                                                                                                                             |
| Bailey, 2003 [22]†                                                              | Logistic regression                                                              | Yes, multivariable analysis was conducted. The adjustments were appropriate, the variables that were statistically significant in univariate analyses were kept in the multivariable analysis, including age and comorbidity      | NA                                                                                                                                                                                                                                  | Factors associated with receipt of surgery plus chemotherapy:<br>age >85 y vs <65 y, OR = 0.10, 95% CI = 0.01 to 0.94                                                                                                                                                         |
| Bailey, 2004 [23]†                                                              | Logistic regression                                                              | Yes, multivariable analysis was conducted. Yes the adjustments were appropriate, the variables that were statistically significant in univariate analyses were kept in the multivariable analysis, including age and comorbidity) | Factors associated with the use of social resources:<br>Age >85 y vs <65 y, OR = 7.50 (95% CI = 1.57 to 35.78),<br>mild/total impairment OMFAQ (poor mental health) vs excellent mental health, OR = 4.48 (95% CI = 1.70 to 11.80). | Factors associated with change in post-treatment functional status:<br>age >85 y vs <65 y, OR = 5.20, 95% CI = 1.17 to 23.05),<br>morbidity score >5, OR = 10.01, 95% CI = 4.84 to 20.70                                                                                      |
| Bamias, 2007 [24]                                                               | Cox regression                                                                   | It is not stated if multivariable analysis was conducted and if yes, what adjustments were done                                                                                                                                   | NA                                                                                                                                                                                                                                  | VES-13 score not associated with response, PFS, or OS.                                                                                                                                                                                                                        |
| Bylow, 2008 [25]                                                                | Logistic regression                                                              | No multivariable analysis                                                                                                                                                                                                         | NA                                                                                                                                                                                                                                  | Factors statistically significant associated with abnormal physical performance: age, ADL, IADL, SPMSQ score, VES-13 score, use of assistive device (cane or walker);<br>Factors statistically significant associated with falls: ADL, use of assistive device, VES-13 score. |

| First author, year [reference] | Type of statistical analysis                                               | Was multivariable analysis conducted and were adjustments appropriate?                                                                           | Use of care                                                                                                                                             | Other outcomes studied                                                                                                                                                                                                                                                                                                                                                                                                                                                                                                                                                   |
|--------------------------------|----------------------------------------------------------------------------|--------------------------------------------------------------------------------------------------------------------------------------------------|---------------------------------------------------------------------------------------------------------------------------------------------------------|--------------------------------------------------------------------------------------------------------------------------------------------------------------------------------------------------------------------------------------------------------------------------------------------------------------------------------------------------------------------------------------------------------------------------------------------------------------------------------------------------------------------------------------------------------------------------|
| Kothari, 2011 [33]             | Correlation analysis, Fisher exact test, and Wilcoxon rank sum test        | NA                                                                                                                                               | NA                                                                                                                                                      | Which preoperative geriatric screens were associated with a discharge location other than home: IADL shopping disability ( $r = .39$ , $P = .002$ ), GDS Question 12 (do you feel pretty worthless the way you are now?) ( $r = .355$ , $P = .037$ ; OR = 11.67, 95% CI = 0.68 to 202.86, $P = .047$ ); What preoperative geriatric screens were associated with a longer hospital stay: Questions 1, 9, and 10 of NSI NHC (ie, condition made me change type of food I eat; lost or gained 10 lbs in last 6 mo; not always able to physically shop, cook, feed myself). |
| Massa, 2006 [36]               | Spearman rank correlation, Student <i>t</i> tests                          | NA                                                                                                                                               | NA                                                                                                                                                      | An increase in rHuEPO was correlated with an increase in cognitive functioning by MMSE ( $r = .639$ , $P = .049$ ). There was no correlation between changes in hemoglobin level and changes in CGA domains.                                                                                                                                                                                                                                                                                                                                                             |
| Massa, 2008 [76]               | ANOVA and regression analysis, not further specified, Spearman correlation | No, not mentioned if the regression was multivariable or not, no results provided other than <i>P</i> values                                     | NA                                                                                                                                                      | Better clinical response observed in fit vs intermediate or frail patients ( $P < .001$ ), in intermediate vs frail patients ( $P = .008$ ); MGA score correlated with clinical response ( $r = .55$ , $P < .002$ ), in regression analysis MGA was predictive of clinical treatment response ( $P < .001$ ). The MGA category did not change over time.                                                                                                                                                                                                                 |
| Puts, 2010 [94]                | Logistic and multinomial logistic regression                               | Yes, models were adjusted for age, sex, comorbidity, extensive treatment received, stage of disease, and diagnosis                               | None of the frailty markers predicted hospitalization or visits to the GP. Cognitive impairment predicted ED visits (OR = 4.97, 95% CI = 1.14 to 21.69) | NA                                                                                                                                                                                                                                                                                                                                                                                                                                                                                                                                                                       |
| Rao, 2005 [38]                 | ANOVA and Cox proportional hazard regression analysis                      | Unclear, Cox proportional hazard regression analysis was univariate, ANOVA was adjusted for baseline health variables, but unclear which exactly | NA                                                                                                                                                      | The effects of the four different treatment arms on several outcomes were compared. A positive effect of geriatric inpatient care was found for SF-36 bodily pain,                                                                                                                                                                                                                                                                                                                                                                                                       |

| First author, year [reference]                                        | Type of statistical analysis                            | Was multivariable analysis conducted and were adjustments appropriate?                                                                                                 | Use of care | Other outcomes studied                                                                                                                                                                                                                                                                                                                                                                                                                                                                                      |
|-----------------------------------------------------------------------|---------------------------------------------------------|------------------------------------------------------------------------------------------------------------------------------------------------------------------------|-------------|-------------------------------------------------------------------------------------------------------------------------------------------------------------------------------------------------------------------------------------------------------------------------------------------------------------------------------------------------------------------------------------------------------------------------------------------------------------------------------------------------------------|
|                                                                       |                                                         |                                                                                                                                                                        |             | emotional limitation, and mental health at discharge and at 6 mo. Only the effect on bodily pain was sustained at 1 y. No effect of geriatric outpatient care on the study outcomes, no effect of all treatment arms on functional status, no difference in costs.                                                                                                                                                                                                                                          |
| Tucci, 2009 [40]                                                      | Fisher exact test, Student <i>t</i> test, log-rank test | NA                                                                                                                                                                     | NA          | Patients classified as fit according to the Balducci classification were younger than those classified as unfit ( $P<.001$ ), had less frequent systemic symptoms ( $P=.03$ ), and higher response rates (92.5% vs 48.8%, $P<.001$ ).                                                                                                                                                                                                                                                                       |
| <b>Geriatric assessment studied in a cross-sectional study design</b> |                                                         |                                                                                                                                                                        |             |                                                                                                                                                                                                                                                                                                                                                                                                                                                                                                             |
| Basso, 2008 [79]                                                      | Kaplan–Meier analysis, log-rank test                    | No multivariable analysis                                                                                                                                              | NA          | No statistically significant difference in the use of elderly-adapted regimens between geriatric assessment groups; 58.7% of participants with adapted treatment protocols had grade 3 or 4 toxicity and 54.9% of participants with standard protocols had grade 3 or 4 toxicity. The frail and non-frail did not differ in terms of toxicities. The incidence of treatment interruption was higher in frail patients, and frail patients had less benefit in terms of tumor response and clinical benefit. |
| Bylow, 2011 [43]                                                      | Logistic and ordinal logistic regression                | Yes, multivariable analysis was conducted. Yes the adjustments were appropriate, the models were adjusted for age, PSA, Gleason score, radiation, comorbidity, and ADT | NA          | Factors statistically significant associated with frailty: OARS comorbidity (B statistic = 0.38, $P = .01$ ); Falls: OARS comorbidity (OR = 2.02, $P = .01$ ); no variable was associated with SPPB score <10.                                                                                                                                                                                                                                                                                              |
| Di Mauro, 2000 [44]                                                   | Linear regression, non-parametric correlations          | No, multivariable analysis results not reported                                                                                                                        | NA          | Control subjects differed from cancer patients with respect to following geriatric assessment domains: number of comorbidities, GDS score, ADL score, and ECOG PS score.                                                                                                                                                                                                                                                                                                                                    |
| Dujon, 2006 [45]                                                      | <i>T</i> test and Spearman correlation                  | NA                                                                                                                                                                     | NA          | There was a correlation between ECOG PS and ADL, IADL; there was no correlation between PS and comorbidity                                                                                                                                                                                                                                                                                                                                                                                                  |

| First author, year [reference] | Type of statistical analysis                                                        | Was multivariable analysis conducted and were adjustments appropriate?                                                                                      | Use of care | Other outcomes studied                                                                                                                                                                                                                                                                                                                                                                     |
|--------------------------------|-------------------------------------------------------------------------------------|-------------------------------------------------------------------------------------------------------------------------------------------------------------|-------------|--------------------------------------------------------------------------------------------------------------------------------------------------------------------------------------------------------------------------------------------------------------------------------------------------------------------------------------------------------------------------------------------|
|                                |                                                                                     |                                                                                                                                                             |             | nor between PS and TUG                                                                                                                                                                                                                                                                                                                                                                     |
| Girones, 2010 [47]             | Descriptive statistics                                                              | NA                                                                                                                                                          | NA          | There were statistically significant correlations between: age and PS, age and ADL, age and IADL, and comorbidity and polypharmacy (correlation coefficients NR).                                                                                                                                                                                                                          |
| Hurria, 2009 [90]              | Logistic regression                                                                 | Yes, multivariable analysis was conducted. No, the adjustments were insufficient, the models were only adjusted for age, physical function, and medications | NA          | Requiring assistance with IADL ( $P = .015$ ) and a lower score on MOS physical function scale ( $P = .018$ ) were associated with higher distress score. ORs and correlation coefficients NR.                                                                                                                                                                                             |
| Mantovani, 2004 [53]           | <i>T</i> test, Mann-Whitney <i>U</i> test; $\chi^2$ test; Spearman rank correlation | NA                                                                                                                                                          | NA          | Elderly cancer patients had statistically significantly higher IL-6 and CRP levels compared with adult cancer patients, and the strongest associations were observed between IL-6 and ADL, IL-6 and IADL, and IL-6 and nutrition.                                                                                                                                                          |
| Mohile, 2009 [54]              | Logistic regression                                                                 | Yes, multivariable analysis was conducted. Yes, the adjustments were appropriate; the models were adjusted for, age, sex, comorbidity, and cancer type.     | NA          | A cancer diagnosis was associated with low self-rated health (OR = 1.46, 95% CI = 1.3 to 1.64), limitations in ADL (OR = 1.19, 95% CI = 1.06 to 1.33), limitations in IADL (OR = 1.25, 95% CI = 1.13 to 1.38), having a geriatric syndrome (OR = 1.27, 95% CI = 1.15 to 1.41), a VES-13 score $\geq 3$ (OR = 1.26, 95% CI = 1.13 to 1.41), and frailty (OR = 1.46, 95% CI = 1.29 to 1.65). |
| Pope, 2006 [60]                | Logistic regression                                                                 | Yes, multivariable analysis was conducted. Yes, the adjustments were appropriate, the models were adjusted for age, sex, and type and stage of cancer.      | NA          | Factors associated with comorbidity: IADL dependent vs independent (OR = 1.97, 95% CI = 1.31 to 2.92), BFI moderate or severe vs none or mild (OR = 1.63, 95% CI = 1.01 to 2.66), ASA moderate or severe vs normal or mild (OR = 1.89, 95% CI = 1.19 to 2.99).                                                                                                                             |
| Repetto, 2002 [61]             | Logistic regression                                                                 | Yes, multivariable analysis was conducted. No, the adjustments were insufficient, the models were only adjusted for age and sex                             | NA          | Association between modified SIC and CGA; ADL dependent vs independent (OR = 1.7, 95% CI = 1.0 to 3.1), IADL dependent vs independent (OR = 1.7, 95% CI = 1.1 to 2.5), GDS depressed vs nondepressed (OR = 0.7, 95% CI = 0.4 to                                                                                                                                                            |

| First author, year [reference]                                                 | Type of statistical analysis | Was multivariable analysis conducted and were adjustments appropriate?                                                                                      | Use of care | Other outcomes studied                                                                                                                                                                                                                                                                                                                                                                                        |
|--------------------------------------------------------------------------------|------------------------------|-------------------------------------------------------------------------------------------------------------------------------------------------------------|-------------|---------------------------------------------------------------------------------------------------------------------------------------------------------------------------------------------------------------------------------------------------------------------------------------------------------------------------------------------------------------------------------------------------------------|
|                                                                                |                              |                                                                                                                                                             |             | 1.0).                                                                                                                                                                                                                                                                                                                                                                                                         |
| Overcash, 2007 [58]                                                            | Logistic regression          | Yes, multivariable analysis was conducted. No the adjustments were insufficient, the models were only adjusted for age and sex                              | NA          | Factors associated with falls: IADL (OR = 1.18, 95% CI = 1.09 to 1.28).                                                                                                                                                                                                                                                                                                                                       |
| Overcash, 2008 [77]                                                            | Logistic regression          | Yes, multivariable analysis was conducted. No, the adjustments were insufficient, the models were only adjusted for age and sex,                            | NA          | Factors associated with falls in entire sample: ADL (OR = 0.72, 95% CI = 0.64 to 0.80);<br>Factors associated with falls in no treatment group: ADL (OR = 1.45, 95% CI = 1.23 to 1.71), GDS (OR = 0.93, 95% CI = 0.88 to 0.99), MMSE (OR = 1.12, 95% CI = 1.03 to 1.21);<br>Factors associated with falls in treatment group: ADL (OR = 3.40, 95% CI = 2.10 to 5.49).                                         |
| <b>Geriatric assessment studied in retrospective studies and chart reviews</b> |                              |                                                                                                                                                             |             |                                                                                                                                                                                                                                                                                                                                                                                                               |
| Fratino, 1999 [69]                                                             | Logistic regression          | Yes, multivariable analysis was conducted. Yes, the adjustments were appropriate, the models were adjusted for age, sex, PS, type of tumor, and comorbidity | NA          | Factors associated with ADL disability: females vs males (OR = 2.1, 95% CI = 1.5 to 2.8), comorbidity (OR = 2.3, 95% CI = 1.6 to 3.1), ECOG PS $\geq 2$ vs 0-1 (OR = 17.3, 95% CI = 16.5 to 18.2);<br>Factors associated with IADL disability: comorbidity (OR = 1.6, 95% CI = 1.1 to 2.1), PS $\geq 2$ vs 0-1 (OR = 4.4, 95% CI = 3.8 to 4.9), hematological vs solid tumor (OR = 2.1, 95% CI = 1.6 to 2.6). |
| Garman, 2004 [86]                                                              | NR                           | NR                                                                                                                                                          | NA          | Goals for admission (success rates for obtaining these goals): 25% of patients had as a goal to receive a diagnosis (78%), 92% had as a goal to obtain symptom relief (73%), 81% had as a goal to obtain functional improvement (79%), 50% had as a goal to prepare comprehensive discharge plan and arrange caregiver support (100%).                                                                        |
| Wedding, 2007 [68]                                                             | Linear regression            | Yes, multivariable analysis was conducted. Yes, the adjustments were appropriate; the variables were selected based on <i>P</i> values.                     | NA          | Factors associated with global QOL in elderly cancer patients: KPS (B statistic = -6.5, <i>P</i> < .001), comorbidity (B statistic = -7.3, <i>P</i> = .0327);                                                                                                                                                                                                                                                 |



| First author, year [reference] | Type of statistical analysis                                                                                       | Was multivariable analysis conducted and were adjustments appropriate?            | Use of care | Other outcomes studied                                                                                                                                                                                                                                                                                                                                     |
|--------------------------------|--------------------------------------------------------------------------------------------------------------------|-----------------------------------------------------------------------------------|-------------|------------------------------------------------------------------------------------------------------------------------------------------------------------------------------------------------------------------------------------------------------------------------------------------------------------------------------------------------------------|
|                                |                                                                                                                    | However, age was not statistically significant but was included in all the models |             | Factors associated with global QOL in younger cancer patients:<br>IADL (B statistic = -11.3, $P = .0251$ ),<br>KPS (B statistic = -6.6, $P < .001$ );<br>Factors associated with global QOL in elderly non-cancer patients:<br>age (B statistic = 0.6, $P = .016$ ),<br>IADL (B statistic = -17.6, $P = .048$ ),<br>KPS (B statistic = -6.9, $P < .001$ ). |
| Wedding, 2007 [99]             | A classification and regression tree was used to identify variables of CGA that contribute to physicians' judgment | NA                                                                                | NA          | Correlations within CGA: comorbidity and ADL ( $r = .023$ ), number of medications and ADL ( $r = -0.23$ ; $P < .05$ ); CGA was more sensitive than physicians' judgment to classifying patients as fit, frail, or vulnerable.                                                                                                                             |

\*NA = not applicable; NR = not reported; HR = hazard ratio; RR = relative risk; OR = odds ratio; CI = confidence interval; ADL= Activities of Daily Living; ADT= Androgen Deprivation Therapy; ANOVA= Analysis of Variance; ASA=American Society of Anesthesiology; B= regression coefficient linear regression analysis; BDI = Beck Depression Inventory; BFI = Brief Fatigue Inventory; BMI = body mass index; CGA = comprehensive geriatric assessment; CCI = Charlson Comorbidity Index; CRP = C-reactive protein; CIRS-G = Cumulative Illness Rating Scale-Geriatric; DLCL= diffuse large cell lymphoma; ECOG PS = Eastern Collaborative Group Oncology performance status; ED= Emergency Department; FACT = Functional assessment Cancer treatment; FIGO = International Federation of Gynecology and Obstetrics; GDS = Geriatric Depression Scale; GFI = Groningen Frailty Indicator; GP= general practitioner; HADS = Hospital Anxiety and Depression Scale; IADL = instrumental activities of daily living; IQCODE = Informant Questionnaire on Cognitive Decline in the Elderly; IL-6 = interleukin 6; KPS = Karnofsky performance status; MGA = Multidimensional Geriatric Assessment; MHI 5 = Mental Health Index 5 items; MMSE = Mini Mental State Examination; MNA = Mini Nutritional Assessment; MOS = Medical Outcome Survey; NPV = negative predictive value; NSI = Nutritional Risk Screening; NSI NHC = Nutrition Screening Initiative Nutritional Health Checklist; OARS = Older Americans Resources and Services; OASIS = Outcome Assessment Information Set database; OMFAQ= OARS Multidimensional Functional Assessment Questionnaire; OS = overall survival; PFS = progression-free survival; PINI = Prognostic Inflammatory and Nutritional Index; PPV = positive predictive value; PSA = prostate-specific antigen; QOL = quality of life; rHuEPO= recombinant human erythropoietin; SF-36= 36-Item Short Form Health Survey; SIC = Satariano Comorbidity Index; SPMSQ = Short Portable Mental screening Questionnaire; SPPB = Short Physical Performance Battery; TUG =Timed Up and Go test; VES-13 = Vulnerable Elder Survey 13 items.

†These articles report on the same study.
